1  
2  
3  
4  
5  
6  
7  
8  
9  
10  
11  
12  
13  
14  
15  
16  
17  
18  
19  
20  
21  
22  
23  
24  
25  
26  
27  
28  
29  
30  
31  
32  
33  
34  
35  
36  
37  
38  
39  
40  
41  
42  
43

## **Coupled protein quality control during nonsense mediated mRNA decay**

Alison J. Inglis<sup>\*1</sup>, Alina Guna<sup>\*2</sup>, Ángel Gálvez Merchán<sup>\*1</sup>, Akshaye Pal<sup>1</sup>, Theodore K. Esantsi<sup>2,3</sup>, Heather R. Keys<sup>2</sup>, Evgeni M. Frenkel<sup>2</sup>, Robert Oania<sup>1</sup>, Jonathan S. Weissman<sup>2,3</sup>, and Rebecca M. Voorhees<sup>1†</sup>

\* These authors contributed equally to this work

<sup>1</sup> Division of Biology and Biological Engineering, California Institute of Technology, 1200 E. California Blvd, CA 91125, USA

<sup>2</sup> Whitehead Institute for Biomedical Research, Massachusetts Institute of Technology, Cambridge, MA 02142, USA

<sup>3</sup> Howard Hughes Medical Institute, Massachusetts Institute of Technology; Cambridge, MA 02142, USA

† For correspondence: [voorhees@caltech.edu](mailto:voorhees@caltech.edu)

44 **ABSTRACT**

45

46 Translation of mRNAs containing premature termination codons (PTCs) can result in truncated  
47 protein products with deleterious effects. Nonsense-mediated decay (NMD) is a surveillance path-  
48 way responsible for detecting and degrading PTC containing transcripts. While the molecular  
49 mechanisms governing mRNA degradation have been extensively studied, the fate of the nascent  
50 protein product remains largely uncharacterized. Here, we use a fluorescent reporter system in  
51 mammalian cells to reveal a selective degradation pathway specifically targeting the protein prod-  
52 uct of an NMD mRNA. We show that this process is post-translational, and dependent on an intact  
53 ubiquitin proteasome system. To systematically uncover factors involved in NMD-linked protein  
54 quality control, we conducted genome-wide flow cytometry-based screens. Our screens recovered  
55 known NMD factors, and suggested a lack of dependence on the canonical ribosome-quality con-  
56 trol (RQC) pathway. Finally, one of the strongest hits in our screens was the E3 ubiquitin ligase  
57 CNOT4, a member of the CCR4-NOT complex, which is involved in initiating mRNA degrada-  
58 tion. We show that CNOT4 is involved in NMD coupled protein degradation, and its role depends  
59 on a functional RING ubiquitin ligase domain. Our results demonstrate the existence of a targeted  
60 pathway for nascent protein degradation from PTC containing mRNAs, and provide a framework  
61 for identifying and characterizing factors involved in this process.

## 62 INTRODUCTION

63  
64 Nonsense mediated mRNA decay (NMD) is a broadly conserved and essential surveillance  
65 pathway that ensures the integrity of the transcriptome and regulates the levels of many cellular  
66 mRNA transcripts. NMD was initially identified for its role in recognizing and degrading aberrant,  
67 disease-causing mRNAs that contain a premature termination codon (PTC) within their open read-  
68 ing frame (Chang & Kan, 1979; Losson & Lacroute, 1979; Maquat et al., 1981). When translated,  
69 these mRNAs produce truncated proteins that can be aggregation-prone, develop gain of function  
70 phenotypes, (Nonaka et al. 2009) or have dominant negative effects (Dietz et al., 1993; Hall &  
71 Thein, 1994; Kugler et al., 1995; Thein et al., 1990). NMD thus plays a critical role in maintaining  
72 cellular proteostasis by preventing expression of these potentially deleterious truncated proteins.  
73 Further, one third of genetic disorders (Mort et al., 2008), including muscular dystrophy (Kerr et  
74 al., 2001) and cystic fibrosis (O'Sullivan, 2014) and many cancers (Anczuków et al., 2008; Karam  
75 et al., 2008; Perrin-Vidoz et al., 2002; Reddy et al., 1995; Ware et al., 2006) are the result of PTC-  
76 causing mutations that lead to recognition and degradation of the resulting mRNAs by NMD.

77 In addition to its role in transcriptome maintenance, NMD also regulates the levels of  
78 roughly 10% of endogenous transcripts, facilitating rapid and flexible changes in gene expression  
79 in response to environmental and developmental stimuli (He et al., 2003; Lelivelt & Culbertson,  
80 1999; Rehwinkel et al., 2005). NMD thus plays a fundamental role in diverse, but physiologically  
81 essential processes including regulating the temporal expression of proteins during the cell cycle  
82 (Choe et al., 2014); degrading PTC-containing transcripts produced by somatic recombination dur-  
83 ing immune system development (Bruce & Wilkinson, 2003); and suppressing viral gene expres-  
84 sion as a component of the innate immune response (Balistreri et al., 2014; Ramage et al., 2015).

85 While there are no definitive rules as to what defines an NMD substrate, the composition  
86 of protein factors that decorate the 3'UTR of an mRNA seem to either promote or prevent its  
87 degradation via NMD (Behm-Ansmant et al., 2007; Singh et al., 2008). For example, the position-  
88 ing of poly(A) binding protein (PABP) adjacent to the termination codon has been shown to be  
89 protective (Silva et al., 2008), while unusual physical features such as upstream open reading  
90 frames (uORFs) and long 3'UTRs are established cues for degradation by NMD (Behm-Ansmant  
91 et al., 2007; Mendell et al., 2004; Singh et al., 2008). It has also been observed that the many  
92 apparently 'normal' transcripts that are regulated by NMD have lower codon optimality and a  
93 higher rate of out-of-frame translation (Celik et al., 2017). However, the best characterized trigger  
94 for recognition by NMD is the presence of an intron downstream of a stop codon, which is com-  
95 monly the result of genetic mutations or defects in alternative splicing (Shoemaker & Green,  
96 2012). Splicing of these introns results in the deposition of an exon-junction complex (EJC) 24  
97 nucleotides upstream of the splice site, which is retained upon packaging and export to the cyto-  
98 plasm (Ballut et al., 2005; Hoskins & Moore, 2012; le Hir et al., 2000, 2001). Because the majority  
99 of endogenous stop codons are localized within the last exon of protein coding genes, EJCs are  
100 typically removed during translational elongation (Dostie & Dreyfuss, 2002). The persistence of  
101 an EJC downstream of a stop codon is thus a characteristic of a PTC-containing mRNA and results  
102 in robust recognition by the NMD pathway (Gehring et al., 2003; Palacios et al., 2004).

103 Translation termination in the presence of a downstream EJC triggers NMD through a net-  
104 work of interactions between the core NMD factors UPF1, UPF2 and UPF3B; the downstream  
105 EJC; and the translational termination factors including eRF1 and eRF3 (Chamieh et al., 2008;  
106 Czaplinski et al., 1998; Kim et al., 2001; le Hir et al., 2001). Phosphorylation of UPF1 by SMG1  
107 recruits a suite of RNA decay machinery to decap (DCP2) (Cho et al., 2009; Lai et al., 2012),

108 deadenylate (CCR4-NOT) (Loh et al., 2013), cleave (SMG6) (Eberle et al. 2009; Huntzinger et al.  
109 2008), and ultimately degrade the associated mRNA.

110 Like other mRNA surveillance pathways, NMD substrates are recognized and targeted for  
111 degradation co-translationally (Belgrader et al., 1993; J. Wang et al., 2002; Zhang & Maquat,  
112 1997), resulting in the synthesis of a potentially aberrant nascent polypeptide chain. Pathways such  
113 as no-go and non-stop mRNA decay rely on a coordinated protein quality control pathway, known  
114 as ribosome associated quality control (RQC) to both rescue the ribosome and concomitantly target  
115 the nascent protein for degradation (Doma & Parker, 2006; Frischmeyer et al., 2002; Juskiewicz  
116 et al., 2018; van Hoof et al., 2002). In both cases, a terminally stalled ribosome or a collided di-  
117 ribosome triggers ribosome splitting (Becker et al., 2011; Pisareva et al., 2011; Shao et al., 2015,  
118 2016; Shoemaker & Green, 2012) and nascent chain ubiquitination by the E3 ligase LTN1 (facil-  
119 itated by NEMF, TAE2, and P97) (Brandman et al., 2012; Defenouillère et al., 2013; Lyumkis et  
120 al., 2014; Shao et al., 2013, 2015; Verma et al., 2013). The ubiquitinated nascent chain is then  
121 released from the ribosome by the endonuclease ANKZF1 (Vms1 in yeast) for degradation by the  
122 proteasome (Rendón et al., 2018; Verma et al., 2018).

123 Given the potential dominant negative and proteotoxic effects of even small amounts of a  
124 truncated NMD substrate, it has been suggested that a similar protein quality control pathway may  
125 exist to recognize and degrade nascent proteins that result from translation of NMD mRNAs. In-  
126 deed, proteins produced from PTC-containing mRNAs are less stable than those from normal tran-  
127 scripts (Kuroha, Tatematsu, and Inada 2009; Kuroha et al. 2013; Pradhan et al. 2021; Udy and  
128 Bradley 2021). However, these observations are largely based on comparison of truncated products  
129 with longer, potentially more stable polypeptides, making it difficult to distinguish NMD linked  
130 protein degradation from general cellular quality control mechanisms. Recent studies more directly  
131 test this using a full-length protein product, but have not defined the mechanism of its targeting  
132 and degradation, nor directly identified a role for the ubiquitin-proteasome pathway. Furthermore,  
133 though it has been postulated that components of the RQC are involved in turnover of nascent  
134 NMD substrates (Arribere & Fire, 2018), the factors required for this process have not been sys-  
135 tematically investigated. Because NMD is triggered at a stop codon unlike no-go and non-stop  
136 decay, a putative NMD-coupled protein quality control pathway may require a fundamentally dif-  
137 ferent strategy to initiate nascent protein degradation.

138 Here we describe a reporter system that we have used to definitively define and character-  
139 ize a coupled protein quality control branch of NMD. We demonstrate that in addition to triggering  
140 mRNA degradation, NMD concomitantly coordinates degradation of the nascent polypeptide via  
141 the ubiquitin-proteasome pathway. Using this reporter system, we systematically identify factors  
142 required for NMD-coupled protein degradation, which are distinct from the canonical rescue fac-  
143 tors of the RQC. Characterization of a coupled protein-degradation branch of NMD represents a  
144 new facet of our understanding of how the cell ensures the integrity and composition of its prote-  
145 ome, and sheds further light on the interplay between mRNA and protein quality control.

146

## 147 **RESULTS**

148

### 149 **A reporter strategy to decouple mRNA and protein quality control in NMD**

150 To identify a putative NMD-linked protein quality control pathway, we developed a reporter  
151 system that sought to uncouple mRNA and protein quality control during NMD. The reporter con-  
152 sists of a single open reading frame expressing GFP and RFP, separated by a viral 2A sequence  
153 that causes peptide skipping (Y. Wang et al., 2015) (Fig. 1A, sFig. 1A). A robust example of an

154 endogenous NMD substrate is the  $\beta$ -globin gene with a nonsense mutation at codon 39, which  
155 results in a premature stop codon followed by an intron (Jing et al., 1998). We therefore reasoned  
156 that positioning the first intron of the human  $\beta$ -globin gene into the 3'UTR of our reporter after  
157 the stop codon would also lead to its recognition as an NMD substrate, as has been previously  
158 reported (Chu et al., 2021; Lykke-Andersen et al., 2000; Pereverzev et al., 2015). We confirmed  
159 that the exogenous  $\beta$ -globin intron is efficiently spliced (sFig. 1B), and observed that the mRNA  
160 levels of the NMD reporter were  $\sim$ 5-fold lower than a matched non-NMD control (Fig. 1B). We  
161 found that the GFP fluorescence of the NMD reporter and control correlated with their respective  
162 mRNA levels, as directly measured by qPCR, suggesting that GFP fluorescence can be used as a  
163 proxy for transcript levels (sFig. 1C). Finally, knockdown of the core NMD factor UPF1 specifi-  
164 cally increased the GFP fluorescence of the NMD reporter (sFig. 1F), but had no effect on the  
165 matched control. We therefore concluded that our fluorescent reporter is recognized and degraded  
166 in an NMD-dependent manner.

167 Recognition of our reporter as an NMD substrate, and subsequent mRNA decay, is a pre-  
168 requisite for establishing whether there is an additional pathway dedicated to nascent protein deg-  
169 radation. To address this, our reporter has two important physical features. First, it can be used to  
170 deconvolute post-transcriptional versus post-translational effects on reporter fluorescence. Upon  
171 translation, the GFP is released by the 2A sequence while the RFP remains tethered to the ribosome  
172 until the termination codon, where NMD is initiated by interaction between the downstream EJC  
173 and the ribosome. We reasoned that if there is an NMD-coupled pathway that triggers degradation  
174 of the nascent polypeptide, it would thus act only on the RFP but not the released GFP, resulting  
175 in a reduction in the RFP:GFP ratio in comparison to a matched control. In contrast, if NMD  
176 functions only in mRNA degradation, we would expect a decrease in both the RFP and GFP levels  
177 but would observe no change in the RFP:GFP ratio. Second, these reporters can specifically dis-  
178 tinguish nascent protein degradation by a coupled protein quality control pathway from non-spe-  
179 cific recognition by general cellular quality control machinery. Canonical NMD substrates contain  
180 PTCs that result in translation of a truncated protein, which may be misfolded and thus recognized  
181 and degraded by non-specific cytosolic quality control pathways (Popp & Maquat, 2013). By in-  
182 stead using an intact RFP moiety that is recognized as an NMD substrate only because of an intron  
183 in its 3'UTR, any destabilization of RFP must result from a coordinated event that occurs prior to  
184 its release from the ribosome.

185 Indeed, using flow cytometry, we observed a decrease in RFP:GFP fluorescence for an  
186 NMD substrate compared to a matched control (Fig. 1C). Addition of a second  $\beta$ -globin intron to  
187 the 3'UTR (Hoek et al., 2019) resulted in a larger decrease in both the mRNA levels and RFP:GFP  
188 fluorescence, suggesting the two effects may be tightly coordinated (Hoek et al. 2019). While this  
189 decrease in RFP:GFP levels was consistent with NMD-dependent protein quality control, we  
190 sought to exclude several alternative models that could also account for this observation. First, we  
191 swapped the order of the RFP and GFP to rule out that differential maturation and/or turnover rates  
192 of the fluorophores could explain the decrease in RFP:GFP ratio (sFig. 1D) (Amrani et al., 2004;  
193 Balleza et al., 2018). Second, we considered whether the decrease in RFP:GFP ratio could be the  
194 result of NMD-dependent deadenylation and 3' to 5' exonuclease degradation of the reporter  
195 mRNA (Chen & Shyu, 2003; Mitchell & Tollervey, 2003; Takahashi et al., 2003). However, we  
196 detected no change in the relative mRNA levels of the RFP and GFP coding regions of the NMD  
197 substrate (Fig. 1B), confirming that the effect must occur post-transcriptionally.

198 Finally, we addressed two related possibilities: whether slow translational termination, char-  
199 acteristic of NMD substrates (Amrani et al. 2004), or SMG6-dependent endonucleolytic cleavage



200 of the mRNA at the stop codon could explain the RFP:GFP ratio decrease (Eberle et al. 2009). The  
201 former would result in increased dwell time of the ribosome at the stop codon when the ~30 C-  
202 terminal residues of RFP remain occluded in the ribosomal exit tunnel and could prevent RFP  
203 fluorescence. The latter would lead to production of full-length GFP but truncated RFP, and would  
204 be consistent with models proposed for putative NMD-coupled protein quality control in *C. ele-*  
205 *gans* (Arribere & Fire, 2018). However, appending a flexible linker to the C-terminus of RFP to  
206 ensure it is fully emerged from the ribosome at the stop codon did not affect the RFP:GFP ratio  
207 (Fig. 1D). Conversely, scrambling the 2A sequence, such that both the GFP and RFP are tethered  
208 to the ribosome at the stop codon, abolished the ratio difference (Fig. 1E). Together these data  
209 exclude that the NMD-dependent decrease in RFP:GFP ratio is due to changes in translation rate,  
210 processivity, peptide release, endonucleolytic cleavage, or preferential 3'-5' degradation.

### 211 212 **NMD-dependent protein degradation occurs via the ubiquitin proteasome pathway.**

213 Having established that an NMD-dependent decrease in RFP fluorescence occurs post-  
214 translationally, we tested whether inhibition of the ubiquitin-proteasome pathway could rescue the  
215 observed phenotype. We found that both the proteasome inhibitor MG132 and the E1 ubiquitin-  
216 activating enzyme inhibitor MLN7243 specifically increased the RFP:GFP ratio of the NMD re-  
217 porter (Fig. 2A; sFig. 2A). Importantly, this increase was due to an effect on RFP and not GFP  
218 (Fig. 2B), consistent with the model that NMD-dependent protein degradation acts post-transla-  
219 tionally and selectively toward the polypeptide associated with the ribosome at the PTC.

220 To confirm that the observed changes in fluorescence reflect changes at the protein level,  
221 we directly tested for stabilization of RFP upon E1 enzyme inhibition by Western blotting (sFig.  
222 2B). The absence of truncated RFP would be consistent with a model in which NMD-dependent  
223 protein quality control is initiated at the stop codon. Finally, we directly observed a marked in-  
224 crease in ubiquitination of nascent NMD substrates compared to a matched control, excluding  
225 potential indirect effects of ubiquitin-proteasome pathway inhibition (Fig. 2C). Therefore, we con-  
226 cluded that in addition to its well-characterized role in mRNA degradation, NMD also triggers  
227 degradation of nascent proteins via the ubiquitin proteasome pathway.

### 228 229 **Identification of factors required for NMD-coupled protein quality control**

230 Using our characterized reporter, we systematically identified factors required for the pro-  
231 tein degradation arm of NMD using a fluorescence-activated cell sorting (FACS) based CRISPR  
232 interference (CRISPRi) (Horlbeck et al., 2016) and CRISPR knockout (CRISPR-KO) screen. We  
233 reasoned that the knockdown screen would enable study of essential proteins, including the core  
234 NMD factors UPF1 and UPF2 (Hart et al., 2017). Conversely, the knockout screen would identify  
235 factors that require near-complete depletion to induce a measurable phenotype, which can lead to  
236 false negatives in CRISPRi screens (Rosenbluh et al., 2017). To do this, we engineered two K562  
237 human cell lines that expressed the NMD2 reporter either alone or with the CRISPRi silencing  
238 machinery (Gilbert et al., 2014). We transduced the CRISPRi cell line with a single guide RNA  
239 (sgRNA) library targeting all known protein-coding open reading frames as previously described  
240 (hCRISPRi-v2) (Horlbeck et al., 2016). For the knockout screen, we used a novel 100,000 element  
241 library that targets all protein encoding genes (~5 sgRNA/gene), which we used to simultaneously  
242 deliver both the genome wide sgRNA library and cas9 (see methods).

243 We hypothesized that depletion of factors required for NMD-coupled protein quality control  
244 would stabilize RFP, thereby increasing the RFP:GFP ratio. However, depletion of factors that  
245 impede NMD-coupled protein quality control would further decrease the RFP:GFP ratio. For the

246 CRISPRi screen, after eight days of knockdown, we sorted cells with high and low RFP:GFP ratios  
247 via FACS, and identified sgRNAs enriched in those cells by deep sequencing. For the knockout  
248 screen we isolated cells with perturbed RFP:GFP ratios on days eight, ten and twelve post infection  
249 of the CRISPR-KO library. We postulated that essential genes would be better represented at the  
250 earlier time points before their depletion becomes lethal, while factors that require complete de-  
251 pletion and/or have longer half-lives would be detected at later time points.

252 In both the knockdown and knockout screens, we find substantial differences between the  
253 hits identified here and those reported from earlier NMD RNA-degradation screens (Alexandrov  
254 et al., 2017; Baird et al., 2018; Sun et al., 2011; Zinshteyn et al., 2021), suggesting our reporter is  
255 indeed specific to the protein quality control branch of NMD. However, we also identified several  
256 splicing and core NMD factors as effectors of the RFP:GFP ratio. For example, we found that the  
257 core component of the EJC, CASC3 (Gerbracht et al., 2020) is required for NMD-coupled protein  
258 degradation (Fig. 3B, 3C). Furthermore, depletion of several known NMD factors—UPF1, UPF2,  
259 UPF3b, SMG6—increased the RFP:GFP ratio of our NMD-reporter. Together, these results sug-  
260 gest a single, shared recognition step for both the mRNA and protein quality control branches of  
261 NMD, which requires recognition of an intact EJC downstream of the stop codon via interactions  
262 between the canonical NMD factors and the ribosome.

263 At day eight of the knockout screen, we found that several essential factors required for 5'  
264 to 3' mRNA degradation were enriched in the population of cells with lower RFP:GFP fluores-  
265 cence (Fig. 3C). In both the knockdown and knockout screen, we found that depletion of the E3  
266 ubiquitin ligase CNOT4 increased the RFP:GFP ratio of the reporter, suggesting a potential role  
267 in NMD-coupled protein quality control.

268

### 269 **NMD-coupled protein quality control is not mediated by canonical RQC factors**

270 Notably absent in both the knockdown and knockout screen were canonical components of  
271 the RQC pathway, suggesting that NMD substrates may rely on an alternative strategy for nascent  
272 protein degradation. Because the CRISPRi screen was performed using the same strategy and con-  
273 ditions as earlier reporter screens for non-stop decay—including the same cell type, sgRNA li-  
274 brary, and sampling time point—the screens are directly comparable (Hickey et al., 2020). While  
275 depletion of RQC factors including pelota and the E3 ubiquitin ligase LTN1 were identified in the  
276 non-stop reporter screen, neither are significant hits for NMD-dependent protein degradation in  
277 our system (Fig. 4A, 4B). We directly verified that LTN1 knockdown has no effect on our NMD  
278 reporter, though had a marked effect on the fluorescence ratio of an established non-stop decay  
279 substrate (Fig. 4C). We therefore concluded that NMD-coupled protein degradation is mediated  
280 by a new, uncharacterized set of factors (Chu et al., 2021).

281

### 282 **Factors required for NMD-coupled protein quality control**

283 Hits from the FACS based reporter screens were validated using an arrayed screen with a  
284 matched non-NMD control. These data confirmed that knockdown of the splicing factor CASC3  
285 increased both the GFP levels and the RFP:GFP ratio of our NMD reporter (Fig. 5A). Knockdown  
286 of the 5' decapping enzyme DCP1A also increased GFP levels, but decreased the RFP:GFP ratio.

287 Having observed that the nascent protein is directly ubiquitinated and degraded by the pro-  
288 teasome (Fig 2), we were particularly interested in identifying an E3 ubiquitin ligase responsible  
289 for targeting the NMD-linked nascent chain for degradation. The core NMD factor UPF1 is an E3  
290 ubiquitin RING ligase (Takahashi et al., 2008) and thus would be well-positioned to mediate nas-  
291 cent chain degradation during NMD. Previous studies have demonstrated that UPF1 stimulates

292 proteasomal degradation of proteins expressed from NMD-targeted mRNA transcripts in yeast,  
293 with reporter stability significantly increased in *upf1* knockout strains; however, the mechanism  
294 underlying this phenotype is unclear and a direct role in nascent chain ubiquitination by UPF1 was  
295 not shown (Kuroha et al., 2009). UPF1 was identified as a weak hit in our CRISPRi screen (Fig.  
296 3B), and its depletion resulted in a shift in the RFP:GFP ratio of the NMD reporter (sFig. 1F).  
297 However, rescue of UPF1 knockdown with a RING mutant that disrupts binding with E2 ubiquitin-  
298 conjugating enzymes (Feng et al., 2017) phenocopied wild-type UPF1 in restoring both the GFP  
299 levels and RFP:GFP ratio of our NMD reporter (sFig. 3). This result would be inconsistent with a  
300 role for the RING domain of UPF1 in ubiquitination of the nascent protein, and suggests that the  
301 involvement of UPF1 may instead be upstream of the protein degradation branch.

302 In addition to UPF1, we identified four additional E3 ubiquitin ligases in either the knock-  
303 down and knockout screen (KEAP1, MYLIP, CBLL1, and TRIM25). However, the only ligase  
304 identified in both screens was the RING ligase CNOT4 (Fig 3B, 3C). CNOT4 is a conserved com-  
305 ponent of the multi-subunit CCR4-NOT complex, which regulates eukaryotic gene expression by  
306 deadenylation, i.e. processive shortening of mRNA poly(A) tails (Collart, 2016; Yamashita et al.,  
307 2005). CNOT4 is not a core structural component of the CCR4-NOT complex, is not required for  
308 deadenylation, and in mammals a population of CNOT4 exists independently from the rest of the  
309 CCR4-NOT complex (Jeske et al., 2006; Lau et al., 2009). Indeed, other members of the CCR4-  
310 NOT complex were not identified as significant hits in either the knockdown or knockout NMD  
311 screens (sFig. 4A). However, the matched CRISPRi screen for non-stop decay identified CNOT1  
312 as a robust hit, verifying the efficacy of the sgRNAs (Hickey et al, 2021; sFig. 4B). Further,  
313 CNOT4 contains an N-terminal RING ligase domain (Albert et al., 2002; Hanzawa et al., 2001),  
314 as well as a conserved RNA-binding motif and zinc finger domain (Fig. 6A) (Inada and Makino  
315 2014; Panasenko 2014). These data together suggest an independent role for CNOT4 in NMD-  
316 linked nascent protein degradation.

317 To validate the results of the screens, we first used small interfering RNA (siRNA) to de-  
318 plete CNOT4, and observed a modest, but reproducible increase in the RFP:GFP ratio of our NMD  
319 reporter (Fig. 6B). Exogenous expression of wildtype CNOT4 specifically rescued the RFP:GFP  
320 ratio of the NMD reporter but had no effect on a matched control (Fig. 6B, sFig. 4C), excluding  
321 off-target effects. We then tested whether the rescue was dependent on the E3 ligase activity of  
322 CNOT4. For this, we generated two mutant constructs: (i) a mutation to the catalytic residues of  
323 the CNOT4 RING ligase based on sequence alignments with other RING-containing E3 ligases;  
324 and (ii) a mutant that disrupts binding between CNOT4 and its cognate E3 enzyme (Albert et al.,  
325 2002). Neither the catalytic mutant nor the E2 mutant were able to rescue the RFP:GFP ratio.  
326 Indeed, in the case of the E2 mutant we observed a small but reproducible dominant negative  
327 effect. To exclude off-target effects, we confirmed that depletion of CNOT4, and overexpression  
328 of the wild type or mutant protein did not affect our non-NMD control reporter. Together these  
329 data suggest that CNOT4 is specifically involved in degradation of nascent NMD protein products,  
330 in a manner dependent on its E3 ligase activity.

331

## 332 **DISCUSSION**

333

334 Recognition of an NMD-substrate occurs co-translationally, necessarily resulting in the  
335 production of a nascent, potentially cytotoxic polypeptide chain. NMD typically reduces the  
336 mRNA level of its substrates between 2-50 fold, depending on the transcript and function of the  
337 resulting protein product: a reduction that may not be sufficient to maintain the proteostasis of the



338 cell. As such, there has long been speculation as to whether NMD leverages an additional, post-  
339 translational pathway to directly target these nascent proteins for degradation (Chu et al., 2021;  
340 Kuroha et al., 2009, 2013; Pradhan et al., 2021; Udy & Bradley, 2021).

341 There are two plausible strategies by which protein degradation of NMD nascent chain  
342 occurs. Since many NMD substrates are truncated and thus likely to misfold, they expose hydro-  
343 phobic degrons that will be recognized by general cytosolic quality control machinery. However,  
344 this type of uncoordinated clearance strategy would risk the cell's exposure to transient dominant  
345 negative or gain-of-function activity of these truncated or aberrant proteins. In contrast, a coordi-  
346 nated protein quality control pathway that co-translationally initiates protein degradation prior to  
347 dissociation from the ribosome would be more consistent with other mRNA surveillance pathways.  
348 Indeed, tight coupling of quality control to biogenesis is a strategy used throughout biology to  
349 ensure robust and efficient clearance of mRNA and protein products that fail during their matura-  
350 tion (Rodrigo-Brenni & Hegde, 2012).

351 In the case of NMD, the lack of a robust *in vitro* reconstitution system; the difficulty of  
352 deconvoluting post-transcriptional versus post-translational effects on expression of NMD sub-  
353 strates; and the putative contribution of generalized quality control in turnover of the classical  
354 truncated NMD substrates has made it difficult to definitively identify this type of coordinated  
355 pathway. Using a fluorescent reporter strategy that addresses several of these technical challenges,  
356 we demonstrated that in mammals, NMD relies on a coupled protein quality control branch to  
357 concomitantly target the nascent protein for degradation via the ubiquitin proteasome pathway.

358

### 359 **A coupled protein quality control branch of NMD**

360 We propose the following working model for protein quality control during NMD in mam-  
361 mals (Fig. 7). As the ribosome reaches the stop codon during translational elongation, the protein  
362 composition of the downstream mRNA serves as the primary cue for initiating NMD. At this point,  
363 the nascent polypeptide remains tethered to the ribosome via the peptidyl tRNA. We postulate that  
364 the early recognition steps between the mRNA and protein quality control branches of NMD are  
365 shared, and rely on core NMD factors such as UPF1, UPF2, UPF3b, and CASC3. We postulate  
366 that NMD-coupled quality control is thus initiated through the canonical pathway for recognition  
367 of PTC-containing mRNAs that involves binding between the ribosome, NMD factors, and the  
368 downstream EJC (Gerbracht et al., 2020; Chamieh et al., 2008; Czaplinski et al., 1998; Kim et al.,  
369 2001; le Hir et al., 2001). However, because our screens were designed to specifically query factors  
370 required for NMD-coupled protein quality control, we find substantial differences between hits  
371 identified here and those reported from earlier NMD RNA-degradation screens (Alexandrov et al.,  
372 2017; Baird et al., 2018; Sun et al., 2011; Zinshteyn et al., 2021). This discrepancy suggests that  
373 following recognition of an NMD substrate, the mRNA and protein quality control pathways di-  
374 verge, relying on distinct sets of factors to target and degrade either the mRNA or nascent protein.

375 We favor a model in which degradation of the nascent polypeptide is initiated prior to its  
376 release from the ribosome, as is common to other mRNA surveillance pathways and would mini-  
377 mize potential exposure of an aberrant protein to the cytosol. Consistent with this model we (i)  
378 found that only the nascent polypeptide tethered to the ribosome at the stop codon is subjected to  
379 NMD-coupled degradation (Fig. 1D, Fig. 2B); and (ii) we observe an NMD-specific destabiliza-  
380 tion of an intact, folded protein compared to a matched control. We therefore concluded that the  
381 nascent protein must be somehow 'marked' for degradation prior to its dissociation from the ribo-  
382 some.

383           Following ubiquitination of the nascent protein, it can then be safely released into the cy-  
384           tosol for degradation by the proteasome. In contrast to non-stop and no-go mRNA decay where  
385           the primary cue for protein quality control is ribosome stalling (Brandman & Hegde, 2016), NMD  
386           is initiated at a stop codon and thus may utilize the typical strategy for nascent protein release and  
387           ribosome recycling. Because termination at PTCs occurs more slowly than at a canonical stop  
388           codon (Amrani et al. 2004), this additional window may be critical to allow tagging of the nascent  
389           chain for degradation prior to its release from the ribosome. However, we cannot formally exclude  
390           the possibility that this occurs simultaneously or immediately following translational termination,  
391           but prior to dissociation of the nascent chain.

392

### 393 **A potential role for the RQC pathway in NMD-coupled protein quality control**

394           Several non-mutually exclusive models have been proposed for how to coordinate ubiqui-  
395           tination of the nascent protein chain prior to release. Experiments in *Drosophila* and *C. elegans*  
396           have suggested that at least in some systems, NMD and non-stop decay may be coupled, and levels  
397           of some mRNAs and their associated protein products are regulated by both pathways (Arribere  
398           & Fire, 2018; Hashimoto et al., 2017). A forward genetic screen in *C. elegans* further identified  
399           the canonical RQC factor Pelo (the functional ortholog of dom34/Pelota) as required for repression  
400           of an NMD reporter. Based on these and other experiments, the authors proposed a model whereby  
401           quality control by NMD is initiated by endonucleolytic cleavage of the mRNA upstream of the  
402           stop codon by SMG6. Translation of the resulting truncated mRNA would result in stalling of  
403           subsequent ribosomes at its 3' end, triggering further repression at both the mRNA and protein  
404           level by the non-stop decay and RQC pathways (Arribere & Fire, 2018).

405           If a similar mechanism was occurring in mammalian cells, post-translational degradation  
406           of NMD substrates would depend on the canonical RQC factors including the E3 ubiquitin ligase  
407           LTN1, and the ribosome rescue factors pelota and HBS1. However, the majority of RQC factors  
408           were not significant hits in either of our screens, though were identified in an earlier non-stop  
409           decay screen performed using matched conditions (Hickey et al., 2020). Further, depletion of  
410           LTN1 directly did not affect our NMD reporter under conditions that robustly stabilized a non-  
411           stop decay substrate (Fig. 4C). These results suggest that at least for the class of NMD substrates  
412           represented by our reporter, NMD-coupled protein degradation does not rely on the canonical RQC  
413           pathway. Together these data suggest a functional separation of nonsense and non-stop decay in  
414           mammals, as was observed in *S. cerevisiae* (Arribere & Fire, 2018) and is consistent with the  
415           distinct molecular players identified by NMD versus non-stop mRNA decay screens (e.g. Hodgkin  
416           et al., 1989; Leeds et al., 1991; Pulak & Anderson, 1993; Wilson et al., 2007).

417

### 418 **Direct ubiquitination of the nascent NMD polypeptide**

419           The simpler model for NMD-coupled protein degradation is the direct recruitment of an  
420           E3 ligase that ubiquitinates the nascent chain while it remains tethered to the ribosome. Earlier  
421           studies have suggested that UPF1, a RING domain E3 ubiquitin ligase and core NMD factor that  
422           interacts with both the ribosome and eukaryotic release factors, could carry out this role. UPF1  
423           knockdown has been shown to stabilize protein products produced from NMD substrates mRNAs  
424           (Kuroha, Tatematsu, and Inada 2009; Kuroha et al. 2013; Feng, Jagannathan, and Bradley 2017;  
425           Park et al. 2020; Kadlec et al. 2006; Takahashi et al. 2008). Consistent with these reports, UPF1  
426           was identified in our knockdown screen, and depletion of UPF1 stabilized both the mRNA and  
427           protein levels of our NMD reporter. However, we found that point mutations to UPF1 that specif-  
428           ically affect its ability to recruit its E2 ubiquitin-conjugating enzyme while leaving its ribosome-

429 binding and helicase domains intact, did not have any effect on the protein-degradation phenotype  
430 of our reporter. We therefore concluded that UPF1 is required for NMD-coupled protein quality  
431 control, but plays a role that does not depend on its E3 ubiquitin ligase activity. To reconcile these  
432 results with previous studies, we propose that UPF1 is involved in the early recognition steps of  
433 NMD substrates, which affects both the mRNA and protein degradation branches of NMD. How-  
434 ever, our data are inconsistent with a direct role for UPF1 in ubiquitination of the nascent poly-  
435 peptide.

436

### 437 **A potential role for the E3 ubiquitin ligase CNOT4 in NMD-coupled protein quality control**

438 One of the most striking hits in both our knockdown and knockout screen was the E3 ubi-  
439 quitin ligase CNOT4. CNOT4 is a component of the CCR4-NOT complex, a conserved multi-sub-  
440 unit complex that plays a broad role in gene regulation primarily through its deadenylase activity.  
441 In NMD, the CCR4-NOT complex is recruited to transcripts through interactions between SMG7  
442 and the CCR4-NOT subunit POP2, where it promotes deadenylation and the subsequent 3'-5'  
443 degradation of the mRNA (Loh et al., 2013). CNOT4 is found in all eukaryotes, but is not a core  
444 structural component of the complex: in human cells it is known to cycle on and off, and its deple-  
445 tion does not destabilize other complex components (Jeske et al. 2006; Lau et al. 2009). CNOT4  
446 was not identified as a significant hit in earlier screens querying NMD-mRNA levels (Alexandrov  
447 et al., 2017; Baird et al., 2018; Sun et al., 2011; Zinshteyn et al., 2021), suggesting its function is  
448 specific to the protein degradation branch of NMD.

449 Consistent with this model, we find that depletion of CNOT4 increases the RFP:GFP ratio  
450 of our NMD reporter by preferentially stabilizing the RFP levels, suggesting it does not markedly  
451 effect mRNA transcript levels. Though knockdown of CNOT4 had a reproducible effect in multi-  
452 ple cell types, the phenotype of its depletion on our NMD reporter is modest. This may be due to  
453 several contributing factors. For example, it is clear that most protein quality control pathways are  
454 highly redundant, making it challenging to observe large effects as a result of a single genetic  
455 perturbation (Rodrigo-Brenni & Hegde, 2012; Zavodszky et al., 2021). Indeed, when we generated  
456 a full null mutant, we observed compensation for loss of CNOT4, suggesting that there may be  
457 other E3 ubiquitin ligases that may be at least partially redundant. The phenotypes observed in our  
458 acute knockdown experiments are in-line with those previously reported in other systems. Because  
459 our model suggests CNOT4 may act catalytically in NMD-coupled protein quality control, very  
460 efficient depletion may be required to observe marked phenotypes.

461 However, the modest, but reproducible effect of CNOT4 depletion is highly specific to  
462 NMD substrates. Despite its reported role in proteasome maturation and assembly (Panasenکو &  
463 Collart, 2011), CNOT4 depletion does not affect the fluorescence of our matched non-NMD re-  
464 porter. We therefore concluded that CNOT4 plays a specific role in NMD-coupled protein degra-  
465 dation which cannot be explained by global changes to protein turnover rates. The role of CNOT4  
466 in NMD-coupled protein degradation further appears to be distinct from its role in the CCR4-NOT  
467 complex, because CNOT1 was not a significant hit in our NMD screen, though was identified in  
468 an earlier matched CRISPRi screen for non-stop decay (Hickey et al., 2020). Finally, we demon-  
469 strate that both the E3 ligase activity of CNOT4, and its ability to bind to cognate E2 conjugating  
470 enzymes, is required for its role in NMD-coupled nascent protein degradation.

471 The domain architecture of CNOT4 would be consistent with a putative role in ribosome  
472 binding, given the presence of both a conserved RNA binding and zinc finger domains. Further,  
473 earlier work has implicated CNOT4 in protein quality control of non-stop mRNA decay substrates,  
474 as Not4p (the yeast ortholog of CNOT4) knockout, but not depletion of other CCR4-NOT

475 components, stabilized truncated proteins produced from non-stop mRNAs (Dimitrova et al.,  
476 2009). The mechanistic role of CNOT4 in protein quality control of non-stop and NMD substrates  
477 in diverse eukaryotic systems thus represents an important area for future study.  
478

478

### 479 **Implications of nascent protein degradation in proteostasis**

480 The identification of a tightly coupled protein degradation branch of NMD has several  
481 immediate implications. Most notably, destabilization at the post-translational level will increase  
482 the suppression of NMD substrates. Though we find the effects of NMD-coupled protein degra-  
483 dation on our reporters to be modest (~2-fold), in the context of the cell or an organism, this addi-  
484 tional level of regulation may be critical to prevent deleterious or off-target effects. Effects on  
485 these fluorescent reporters, which are both over-expressed and in which phenotypes require deg-  
486 radation of the remarkably stable RFP moiety, may also underestimate the true effect size on an  
487 endogenous substrate.

488 There are numerous physiologically relevant examples where NMD's role in transcriptome  
489 regulation, and subsequent production of potentially aberrant proteins, require stringent clearance  
490 of the nascent product. During histone production, synthesis must be tightly regulated in a manner  
491 coupled to the progression of the cell cycle, and the production of even small amounts of down-  
492 regulated proteins could be problematic. Our results also have implications for viral infection. Co-  
493 translational protein degradation is thought to be a key source of peptides for MHC presentation  
494 (Balistreri et al., 2014; Fontaine et al., 2018; Wada et al., 2018; Yewdell & Nichitta, 2006), with  
495 viral messages often targeted by NMD (Balistreri et al., 2014; Fontaine et al., 2018; Wada et al.,  
496 2018). Factors such as CNOT4 could mediate this process, promoting the immunological presen-  
497 tation of these peptides.

498 Finally, NMD plays an important role in a wide range of genetic diseases: over one third  
499 of all human genetic disorders are caused by PTC-creating mutations, including muscular dystro-  
500 phy and cystic fibrosis. While generally protective, for numerous disease-causing mutations the  
501 NMD pathway contributes to pathogenesis by suppressing expression of partially functional mu-  
502 tant proteins (~11% of mutations that cause human disease (Mort et al., 2008)). The characteriza-  
503 tion of a second, parallel branch of NMD and the factors involved in NMD-coupled protein quality  
504 control therefore represent novel targets for the therapeutic treatment of human disease.  
505

505

506

507



508 **REFERENCES**

- 509 Albert, T. K., Hanzawa, H., Legtenberg, Y. I. A., de Ruwe, M. J., van den Heuvel, F. A. J., Collart,  
510 M. A., Boelens, R., & Timmers, H. T. M. (2002). Identification of a ubiquitin--protein ligase  
511 subunit within the CCR4--NOT transcription repressor complex. *The EMBO Journal*, *21*(3),  
512 355–364.
- 513 Alexandrov, A., Shu, M.-D., & Steitz, J. A. (2017). Fluorescence amplification method for forward  
514 genetic discovery of factors in human mRNA degradation. *Molecular Cell*, *65*(1), 191–201.
- 515 Amrani, N., Ganesan, R., Kervestin, S., Mangus, D. A., Ghosh, S., & Jacobson, A. (2004). A faux  
516 3'-UTR promotes aberrant termination and triggers nonsense-mediated mRNA decay. *Nature*,  
517 *432*(7013), 112–118.
- 518 Anczuków, O., Ware, M. D., Buisson, M., Zetoune, A. B., Stoppa-Lyonnet, D., Sinilnikova, O.  
519 M., & Mazoyer, S. (2008). Does the nonsense-mediated mRNA decay mechanism prevent  
520 the synthesis of truncated BRCA1, CHK2, and p53 proteins? *Human Mutation*, *29*(1), 65–73.
- 521 Arribere, J. A., & Fire, A. Z. (2018). Nonsense mRNA suppression via nonstop decay. *Elife*, *7*,  
522 e33292.
- 523 Baird, T. D., Cheng, K. C.-C., Chen, Y.-C., Buehler, E., Martin, S. E., Inglese, J., & Hogg, J. R.  
524 (2018). ICE1 promotes the link between splicing and nonsense-mediated mRNA decay. *Elife*,  
525 *7*, e33178.
- 526 Balistreri, G., Horvath, P., Schweingruber, C., Zünd, D., McInerney, G., Merits, A., Mühlemann,  
527 O., Azzalin, C., & Helenius, A. (2014). The host nonsense-mediated mRNA decay pathway  
528 restricts mammalian RNA virus replication. *Cell Host & Microbe*, *16*(3), 403–411.
- 529 Balleza, E., Kim, J. M., & Cluzel, P. (2018). Systematic characterization of maturation time of  
530 fluorescent proteins in living cells. *Nature Methods*, *15*(1), 47–51.
- 531 Ballut, L., Marchadier, B., Baguet, A., Tomasetto, C., Séraphin, B., & le Hir, H. (2005). The exon  
532 junction core complex is locked onto RNA by inhibition of eIF4AIII ATPase activity. *Nature*  
533 *Structural & Molecular Biology*, *12*(10), 861–869.
- 534 Becker, T., Armache, J.-P., Jarasch, A., Anger, A. M., Villa, E., Sieber, H., Motaal, B. A., Mielke,  
535 T., Berninghausen, O., & Beckmann, R. (2011). Structure of the no-go mRNA decay complex  
536 Dom34--Hbs1 bound to a stalled 80S ribosome. *Nature Structural & Molecular Biology*,  
537 *18*(6), 715–720.
- 538 Behm-Ansmant, I., Gatfield, D., Rehwinkel, J., Hilgers, V., & Izaurralde, E. (2007). A conserved  
539 role for cytoplasmic poly (A)-binding protein 1 (PABPC1) in nonsense-mediated mRNA de-  
540 cay. *The EMBO Journal*, *26*(6), 1591–1601.
- 541 Belgrader, P., Cheng, J., & Maquat, L. E. (1993). Evidence to implicate translation by ribosomes  
542 in the mechanism by which nonsense codons reduce the nuclear level of human tri-  
543 osephosphate isomerase mRNA. *Proceedings of the National Academy of Sciences*, *90*(2),  
544 482–486.
- 545 Brandman, O., & Hegde, R. S. (2016). Ribosome-associated protein quality control. *Nature Struc-*  
546 *tural & Molecular Biology*, *23*(1), 7–15. <https://doi.org/10.1038/nsmb.3147>
- 547 Brandman, O., Stewart-Ornstein, J., Wong, D., Larson, A., Williams, C. C., Li, G.-W., Zhou, S.,  
548 King, D., Shen, P. S., Weibezahn, J., & others. (2012). A ribosome-bound quality control  
549 complex triggers degradation of nascent peptides and signals translation stress. *Cell*, *151*(5),  
550 1042–1054.
- 551 Bruce, S. R., & Wilkinson, M. F. (2003). Nonsense-mediated decay: A surveillance pathway that  
552 detects faulty TCR and BCR transcripts. *Research Signpost, Trivandrum, India*.



- 553 Celik, A., Baker, R., He, F., & Jacobson, A. (2017). High-resolution profiling of NMD targets in  
554 yeast reveals translational fidelity as a basis for substrate selection. *Rna*, *23*(5), 735–748.
- 555 Chamieh, H., Ballut, L., Bonneau, F., & le Hir, H. (2008). NMD factors UPF2 and UPF3 bridge  
556 UPF1 to the exon junction complex and stimulate its RNA helicase activity. *Nature Structural*  
557 *& Molecular Biology*, *15*(1), 85–93.
- 558 Chang, J. C., & Kan, Y. W. (1979). B0 Thalassemia, a Nonsense Mutation in Man. *Proceedings*  
559 *of the National Academy of Sciences of the United States of America*, *76*(6), 2886–2889.  
560 <https://doi.org/10.1073/pnas.76.6.2886>
- 561 Chen, C.-Y. A., & Shyu, A.-B. (2003). Rapid deadenylation triggered by a nonsense codon pre-  
562 cedes decay of the RNA body in a mammalian cytoplasmic nonsense-mediated decay path-  
563 way. *Molecular and Cellular Biology*, *23*(14), 4805–4813.
- 564 Cho, H., Kim, K. M., & Kim, Y. K. (2009). Human proline-rich nuclear receptor coregulatory  
565 protein 2 mediates an interaction between mRNA surveillance machinery and decapping  
566 complex. *Molecular Cell*, *33*(1), 75–86.
- 567 Choe, J., Ahn, S. H., & Kim, Y. K. (2014). The mRNP remodeling mediated by UPF1 promotes  
568 rapid degradation of replication-dependent histone mRNA. *Nucleic Acids Research*, *42*(14),  
569 9334–9349.
- 570 Chu, V., Feng, Q., Lim, Y., & Shao, S. (2021). Selective destabilization of polypeptides synthe-  
571 sized from NMD-targeted transcripts. *Molecular Biology of the Cell*, mbc--E21.
- 572 Collart, M. A. (2016). The Ccr4-Not complex is a key regulator of eukaryotic gene expression.  
573 *Wiley Interdisciplinary Reviews: RNA*, *7*(4), 438–454.
- 574 Czaplinski, K., Ruiz-Echevarria, M. J., Paushkin, S. v, Han, X., Weng, Y., Perlick, H. A., Dietz,  
575 H. C., Ter-Avanasyan, M. D., & Peltz, S. W. (1998). The surveillance complex interacts with  
576 the translation release factors to enhance termination and degrade aberrant mRNAs. *Genes*  
577 *& Development*, *12*(11), 1665–1677.
- 578 Defenouillère, Q., Yao, Y., Mouaikel, J., Namane, A., Galopier, A., Decourty, L., Doyen, A.,  
579 Malabat, C., Saveanu, C., Jacquier, A., & others. (2013). Cdc48-associated complex bound  
580 to 60S particles is required for the clearance of aberrant translation products. *Proceedings of*  
581 *the National Academy of Sciences*, *110*(13), 5046–5051.
- 582 Dietz, H. C., Valle, D., Francomano, C. A., Kendzior, R. J., Pyeritz, R. E., & Cutting, G. R. (1993).  
583 The skipping of constitutive exons in vivo induced by nonsense mutations. *Science*,  
584 *259*(5095), 680–683.
- 585 Dimitrova, L. N., Kuroha, K., Tatematsu, T., & Inada, T. (2009). Nascent peptide-dependent trans-  
586 lation arrest leads to Not4p-mediated protein degradation by the proteasome. *Journal of Bio-*  
587 *logical Chemistry*, *284*(16), 10343–10352.
- 588 Doma, M. K., & Parker, R. (2006). Endonucleolytic cleavage of eukaryotic mRNAs with stalls in  
589 translation elongation. *Nature*, *440*(7083), 561–564.
- 590 Dostie, J., & Dreyfuss, G. (2002). Translation is required to remove Y14 from mRNAs in the  
591 cytoplasm. *Current Biology*, *12*(13), 1060–1067.
- 592 Eberle, A. B., Lykke-Andersen, S., Mühlemann, O., & Jensen, T. H. (2009). SMG6 promotes en-  
593 donucleolytic cleavage of nonsense mRNA in human cells. *Nature Structural & Molecular*  
594 *Biology*, *16*(1), 49–55.
- 595 Feng, Q., Jagannathan, S., & Bradley, R. K. (2017). The RNA Surveillance Factor UPF1 Represses  
596 Myogenesis via Its E3 Ubiquitin Ligase Activity. *Molecular Cell*, *67*(2), 239–251.e6.  
597 <https://doi.org/10.1016/j.molcel.2017.05.034>

- 598 Fontaine, K. A., Leon, K. E., Khalid, M. M., Tomar, S., Jimenez-Morales, D., Dunlap, M., Kaye,  
599 J. A., Shah, P. S., Finkbeiner, S., Krogan, N. J., & others. (2018). The cellular NMD pathway  
600 restricts Zika virus infection and is targeted by the viral capsid protein. *MBio*, *9*(6), e02126--  
601 18.
- 602 Frischmeyer, P. A., van Hoof, A., O'Donnell, K., Guerrerio, A. L., Parker, R., & Dietz, H. C.  
603 (2002). An mRNA surveillance mechanism that eliminates transcripts lacking termination  
604 codons. *Science*, *295*(5563), 2258–2261.
- 605 Gehring, N. H., Neu-Yilik, G., Schell, T., Hentze, M. W., & Kulozik, A. E. (2003). Y14 and  
606 hUpf3b form an NMD-activating complex. *Molecular Cell*, *11*(4), 939–949.
- 607 Gerbracht, J. v, Boehm, V., Britto-Borges, T., Kallabis, S., Wiederstein, J. L., Ciriello, S.,  
608 Aschemeier, D. U., Krüger, M., Frese, C. K., Altmüller, J., & others. (2020). CASC3 pro-  
609 motes transcriptome-wide activation of nonsense-mediated decay by the exon junction com-  
610 plex. *Nucleic Acids Research*, *48*(15), 8626–8644.
- 611 Gilbert, L. A., Horlbeck, M. A., Adamson, B., Villalta, J. E., Chen, Y., Whitehead, E. H.,  
612 Guimaraes, C., Panning, B., Ploegh, H. L., Bassik, M. C., & others. (2014). Genome-scale  
613 CRISPR-mediated control of gene repression and activation. *Cell*, *159*(3), 647–661.
- 614 Hall, G. W., & Thein, S. (1994). *Nonsense codon mutations in the terminal exon of the beta-globin*  
615 *gene are not associated with a reduction in beta-mRNA accumulation: a mechanism for the*  
616 *phenotype of dominant beta-thalassemia*.
- 617 Hanzawa, H., de Ruwe, M. J., Albert, T. K., van der Vliet, P. C., Timmers, H. T. M., & Boelens,  
618 R. (2001). The Structure of the C4C4RING finger of human NOT4 reveals features distinct  
619 from those of C3HC4 RING fingers. *Journal of Biological Chemistry*, *276*(13), 10185–  
620 10190.
- 621 Hart, T., Tong, A. H. Y., Chan, K., van Leeuwen, J., Seetharaman, A., Aregger, M., Chandrashek-  
622 har, M., Hustedt, N., Seth, S., Noonan, A., Habsid, A., Sizova, O., Nedyalkova, L., Climie,  
623 R., Tworzyanski, L., Lawson, K., Sartori, M. A., Alibeh, S., Tieu, D., ... Moffat, J. (2017).  
624 Evaluation and Design of Genome-Wide CRISPR/SpCas9 Knockout Screens. *G3: Genes,*  
625 *Genomes, Genetics*, *7*(8), 2719–2727. <https://doi.org/10.1534/g3.117.041277>
- 626 Hashimoto, Y., Takahashi, M., Sakota, E., & Nakamura, Y. (2017). Nonstop-mRNA decay ma-  
627 chinery is involved in the clearance of mRNA 5'-fragments produced by RNAi and NMD in  
628 *Drosophila melanogaster* cells. *Biochemical and Biophysical Research Communications*,  
629 *484*(1), 1–7.
- 630 He, F., Li, X., Spatrack, P., Casillo, R., Dong, S., & Jacobson, A. (2003). Genome-Wide Analysis  
631 of mRNAs Regulated by the Nonsense-Mediated and 5' to 3' mRNA Decay Pathways in  
632 Yeast. *Molecular Cell*, *12*(6), 1439–1452. [https://doi.org/https://doi.org/10.1016/S1097-](https://doi.org/10.1016/S1097-2765(03)00446-5)  
633 [2765\(03\)00446-5](https://doi.org/10.1016/S1097-2765(03)00446-5)
- 634 Hickey, K. L., Dickson, K., Cogan, J. Z., Replogle, J. M., Schoof, M., D'Orazio, K. N., Sinha, N.  
635 K., Hussmann, J. A., Jost, M., Frost, A., & others. (2020). GIGYF2 and 4EHP inhibit trans-  
636 lation initiation of defective messenger RNAs to assist ribosome-associated quality control.  
637 *Molecular Cell*, *79*(6), 950–962.
- 638 Hodgkin, J., Papp, A., Pulak, R., Ambros, V., & Anderson, P. (1989). A new kind of informational  
639 suppression in the nematode *Caenorhabditis elegans*. *Genetics*, *123*(2), 301–313.
- 640 Hoek, T. A., Khuperkar, D., Lindeboom, R. G. H., Sonneveld, S., Verhagen, B. M. P., Boersma,  
641 S., Vermeulen, M., & Tanenbaum, M. E. (2019). Single-molecule imaging uncovers rules  
642 governing nonsense-mediated mRNA decay. *Molecular Cell*, *75*(2), 324–339.

- 643 Horlbeck, M. A., Gilbert, L. A., Villalta, J. E., Adamson, B., Pak, R. A., Chen, Y., Fields, A. P.,  
644 Park, C. Y., Corn, J. E., Kampmann, M., & others. (2016). Compact and highly active next-  
645 generation libraries for CRISPR-mediated gene repression and activation. *Elife*, 5, e19760.
- 646 Hoskins, A. A., & Moore, M. J. (2012). The spliceosome: a flexible, reversible macromolecular  
647 machine. *Trends in Biochemical Sciences*, 37(5), 179–188.
- 648 Huntzinger, E., Kashima, I., Fauser, M., Saulière, J., & Izaurralde, E. (2008). SMG6 is the catalytic  
649 endonuclease that cleaves mRNAs containing nonsense codons in metazoan. *Rna*, 14(12),  
650 2609–2617.
- 651 Jeske, M., Meyer, S., Temme, C., Freudenreich, D., & Wahle, E. (2006). Rapid ATP-dependent  
652 deadenylation of nanos mRNA in a cell-free system from *Drosophila* embryos. *Journal of*  
653 *Biological Chemistry*, 281(35), 25124–25133.
- 654 Jing, Z., Sun, X., Qian, Y., & Maquiat, L. E. (1998). Intron function in the nonsense-mediated  
655 decay of  $\beta$ -globin mRNA: Indications that pre-mRNA splicing in the nucleus can influence  
656 mRNA translation in the cytoplasm. *RNA*, 4(7), 801–815.  
657 <https://doi.org/10.1017/S1355838298971849>
- 658 Jost, M., Chen, Y., Gilbert, L. A., Horlbeck, M. A., Krenning, L., Menchon, G., Rai, A., Cho, M.  
659 Y., Stern, J. J., Protá, A. E., & others. (2017). Combined CRISPRi/a-based chemical genetic  
660 screens reveal that rigosertib is a microtubule-destabilizing agent. *Molecular Cell*, 68(1),  
661 210–223.
- 662 Juskiewicz, S., Chandrasekaran, V., Lin, Z., Kraatz, S., Ramakrishnan, V., & Hegde, R. S. (2018).  
663 ZNF598 is a quality control sensor of collided ribosomes. *Molecular Cell*, 72(3), 469–481.
- 664 Karam, R., Carvalho, J., Bruno, I., Graziadio, C., Senz, J., Huntsman, D., Carneiro, F., Seruca, R.,  
665 Wilkinson, M. F., & Oliveira, C. (2008). The NMD mRNA surveillance pathway downregu-  
666 lates aberrant E-cadherin transcripts in gastric cancer cells and in CDH1 mutation carriers.  
667 *Oncogene*, 27(30), 4255–4260. <https://doi.org/10.1038/onc.2008.62>
- 668 Kerr, T. P., Sewry, C. A., Robb, S. A., & Roberts, R. G. (2001). Long mutant dystrophins and  
669 variable phenotypes: evasion of nonsense-mediated decay? *Human Genetics*, 109(4), 402–  
670 407.
- 671 Kim, V. N., Kataoka, N., & Dreyfuss, G. (2001). Role of the nonsense-mediated decay factor  
672 hUpf3 in the splicing-dependent exon-exon junction complex. *Science*, 293(5536), 1832–  
673 1836.
- 674 Kugler, W., Enssle, J., Hentze, M. W., & Kulozik, A. E. (1995). Nuclear degradation of nonsense  
675 mutated  $\beta\beta$ -globin mRNA: a post-transcriptional mechanism to protect heterozygotes from  
676 severe clinical manifestations of  $\beta\beta$ -thalassemia? *Nucleic Acids Research*, 23(3), 413–418.
- 677 Kuroha, K., Ando, K., Nakagawa, R., & Inada, T. (2013). The Upf factor complex interacts with  
678 aberrant products derived from mRNAs containing a premature termination codon and facil-  
679 itates their proteasomal degradation. *Journal of Biological Chemistry*, 288(40), 28630–  
680 28640.
- 681 Kuroha, K., Tatematsu, T., & Inada, T. (2009). Upf1 stimulates degradation of the product derived  
682 from aberrant messenger RNA containing a specific nonsense mutation by the proteasome.  
683 *EMBO Reports*, 10(11), 1265–1271.
- 684 Lai, T., Cho, H., Liu, Z., Bowler, M. W., Piao, S., Parker, R., Kim, Y. K., & Song, H. (2012).  
685 Structural basis of the PNR2-mediated link between mRNA surveillance and decapping.  
686 *Structure*, 20(12), 2025–2037.

- 687 Lau, N.-C., Kolkman, A., van Schaik, F. M. A., Mulder, K. W., Pijnappel, W. W. M. P., Heck, A.  
688 J. R., & Timmers, H. T. M. (2009). Human Ccr4--Not complexes contain variable deadenyl-  
689 ase subunits. *Biochemical Journal*, *422*(3), 443–453.
- 690 le Hir, H., Gatfield, D., Izaurralde, E., & Moore, M. J. (2001). The exon--exon junction complex  
691 provides a binding platform for factors involved in mRNA export and nonsense-mediated  
692 mRNA decay. *The EMBO Journal*, *20*(17), 4987–4997.
- 693 le Hir, H., Izaurralde, E., Maquat, L. E., & Moore, M. J. (2000). The spliceosome deposits multiple  
694 proteins 20--24 nucleotides upstream of mRNA exon--exon junctions. *The EMBO Journal*,  
695 *19*(24), 6860–6869.
- 696 Leeds, P., Peltz, S. W., Jacobson, A., & Culbertson, M. R. (1991). The product of the yeast UPF1  
697 gene is required for rapid turnover of mRNAs containing a premature translational termina-  
698 tion codon. *Genes & Development*, *5*(12a), 2303–2314.
- 699 Lelivelt, M. J., & Culbertson, M. R. (1999). Yeast Upf Proteins Required for RNA Surveillance  
700 Affect Global Expression of the Yeast Transcriptome. *Molecular and Cellular Biology*,  
701 *19*(10), 6710–6719. <https://doi.org/10.1128/MCB.19.10.6710>
- 702 Li, W., Xu, H., Xiao, T., Cong, L., Love, M. I., Zhang, F., Irizarry, R. A., Liu, J. S., Brown, M.,  
703 & Liu, X. S. (2014). MAGeCK enables robust identification of essential genes from genome-  
704 scale CRISPR/Cas9 knockout screens. *Genome Biology*, *15*(12), 1–12.
- 705 Loh, B., Jonas, S., & Izaurralde, E. (2013). The SMG5--SMG7 heterodimer directly recruits the  
706 CCR4--NOT deadenylase complex to mRNAs containing nonsense codons via interaction  
707 with POP2. *Genes & Development*, *27*(19), 2125–2138.
- 708 Losson, R., & Lacroute, F. (1979). Interference of nonsense mutations with eukaryotic messenger  
709 RNA stability. *Proceedings of the National Academy of Sciences*, *76*(10), 5134–5137.
- 710 Lykke-Andersen, J., Shu, M. di, & Steitz, J. A. (2000). Human Upf proteins target an mRNA for  
711 nonsense-mediated decay when downstream of a termination codon. *Cell*, *103*(7), 1121–  
712 1131. [https://doi.org/10.1016/S0092-8674\(00\)00214-2](https://doi.org/10.1016/S0092-8674(00)00214-2)
- 713 Lyumkis, D., dos Passos, D. O., Tahara, E. B., Webb, K., Bennett, E. J., Vinterbo, S., Potter, C.  
714 S., Carragher, B., & Joazeiro, C. A. P. (2014). Structural basis for translational surveillance  
715 by the large ribosomal subunit-associated protein quality control complex. *Proceedings of the*  
716 *National Academy of Sciences*, *111*(45), 15981–15986.
- 717 Maquat, L. E., Kinniburgh, A. J., Rachmilewitz, E. A., & Ross, J. (1981). Unstable beta-globin  
718 mRNA in mRNA-deficient beta o thalassemia. *Cell*, *27*(3 Pt 2), 543–553.  
719 <http://www.ncbi.nlm.nih.gov/pubmed/6101206>
- 720 Marino, J., von Heijne, G., & Beckmann, R. (2016). Small protein domains fold inside the ribo-  
721 some exit tunnel. *FEBS Letters*, *590*(5), 655–660.
- 722 Mendell, J. T., Sharifi, N. A., Meyers, J. L., Martinez-Murillo, F., & Dietz, H. C. (2004). Nonsense  
723 surveillance regulates expression of diverse classes of mammalian transcripts and mutes ge-  
724 nomic noise. *Nature Genetics*, *36*(10), 1073–1078. <https://doi.org/10.1038/ng1429>
- 725 Mitchell, P., & Tollervey, D. (2003). An NMD pathway in yeast involving accelerated deadenyl-  
726 ation and exosome-mediated 3'→ 5' degradation. *Molecular Cell*, *11*(5), 1405–1413.
- 727 Mort, M., Ivanov, D., Cooper, D. N., & Chuzhanova, N. A. (2008). A meta-analysis of nonsense  
728 mutations causing human genetic disease. *Human Mutation*, *29*(8), 1037–1047.
- 729 Nagy, E., & Maquat, L. E. (1998). A rule for termination-codon position within intron-containing  
730 genes: when nonsense affects RNA abundance. *Trends in Biochemical Sciences*, *23*(6), 198–  
731 199. [https://doi.org/https://doi.org/10.1016/S0968-0004\(98\)01208-0](https://doi.org/https://doi.org/10.1016/S0968-0004(98)01208-0)



- 732 Nott, A., le Hir, H., & Moore, M. J. (2004). Splicing enhances translation in mammalian cells: an  
733 additional function of the exon junction complex. *Genes & Development*, *18*(2), 210–222.
- 734 O’Sullivan, B. P. (2014). Targeting nonsense-mediated cystic fibrosis: is it premature to stop now?  
735 *The Lancet Respiratory Medicine*, *2*(7), 509–511. [https://doi.org/10.1016/S2213-](https://doi.org/10.1016/S2213-2600(14)70108-0)  
736 [2600\(14\)70108-0](https://doi.org/10.1016/S2213-2600(14)70108-0)
- 737 Palacios, I. M., Gatfield, D., St Johnston, D., & Izaurralde, E. (2004). An eIF4AIII-containing  
738 complex required for mRNA localization and nonsense-mediated mRNA decay. *Nature*,  
739 *427*(6976), 753–757.
- 740 Panasenkov, O. O., & Collart, M. A. (2011). Not4 E3 ligase contributes to proteasome assembly  
741 and functional integrity in part through Ecm29. *Molecular and Cellular Biology*, *31*(8), 1610–  
742 1623.
- 743 Pereverzev, A. P., Gurskaya, N. G., Ermakova, G. v., Kudryavtseva, E. I., Markina, N. M.,  
744 Kotlobay, A. A., Lukyanov, S. A., Zaraisky, A. G., & Lukyanov, K. A. (2015). Method for  
745 quantitative analysis of nonsense-mediated mRNA decay at the single cell level. *Scientific*  
746 *Reports*, *5*(1), 1–10.
- 747 Perrin-Vidoz, L., Sinilnikova, O. M., Stoppa-Lyonnet, D., Lenoir, G. M., & Mazoyer, S. (2002).  
748 The nonsense-mediated mRNA decay pathway triggers degradation of most BRCA1 mRNAs  
749 bearing premature termination codons. *Human Molecular Genetics*, *11*(23), 2805–2814.
- 750 Pisareva, V. P., Skabkin, M. A., Hellen, C. U. T., Pestova, T. v., & Pisarev, A. v. (2011). Dissoci-  
751 ation by Pelota, Hbs1 and ABCE1 of mammalian vacant 80S ribosomes and stalled elonga-  
752 tion complexes. *The EMBO Journal*, *30*(9), 1804–1817.
- 753 Popp, M. W.-L., & Maquat, L. E. (2013). Organizing principles of mammalian nonsense-mediated  
754 mRNA decay. *Annual Review of Genetics*, *47*, 139–165.
- 755 Pradhan, A. K., Kandasamy, G., Chatterjee, U., Bharadwaj, A., Mathew, S. J., Dohmen, R. J., &  
756 Palanimurugan, R. (2021). Ribosome-associated quality control mediates degradation of the  
757 premature translation termination product Orf1p of ODC antizyme mRNA. *FEBS Letters*.
- 758 Pulak, R., & Anderson, P. (1993). mRNA surveillance by the *Caenorhabditis elegans* smg genes.  
759 *Genes & Development*, *7*(10), 1885–1897.
- 760 Ramage, H. R., Kumar, G. R., Verschueren, E., Johnson, J. R., von Dollen, J., Johnson, T., New-  
761 ton, B., Shah, P., Horner, J., Krogan, N. J., & others. (2015). A combined proteomics/ge-  
762 nomics approach links hepatitis C virus infection with nonsense-mediated mRNA decay. *Mo-  
763 lecular Cell*, *57*(2), 329–340.
- 764 Reddy, J. C., Morris, J. C., Wang, J., English, M. A., Haber, D. A., Shi, Y., & Licht, J. D. (1995).  
765 WT1-mediated transcriptional activation is inhibited by dominant negative mutant proteins.  
766 *Journal of Biological Chemistry*, *270*(18), 10878–10884.
- 767 Rehwinkel, J., Letunic, I., Raes, J., Bork, P., & Izaurralde, E. (2005). Nonsense-mediated mRNA  
768 decay factors act in concert to regulate common mRNA targets. *RNA (New York, N.Y.)*,  
769 *11*(10), 1530–1544. <https://doi.org/10.1261/rna.2160905>
- 770 Rendón, O. Z., Fredrickson, E. K., Howard, C. J., van Vranken, J., Fogarty, S., Tolley, N. D.,  
771 Kalia, R., Osuna, B. A., Shen, P. S., Hill, C. P., & others. (2018). Vms1p is a release factor  
772 for the ribosome-associated quality control complex. *Nature Communications*, *9*(1), 1–9.
- 773 Rodrigo-Brenni, M. C., & Hegde, R. S. (2012). Design principles of protein biosynthesis-coupled  
774 quality control. *Developmental Cell*, *23*(5), 896–907.
- 775 Rosenbluh, J., Xu, H., Harrington, W., Gill, S., Wang, X., Vazquez, F., Root, D. E., Tsherniak, A.,  
776 & Hahn, W. C. (2017). Complementary information derived from CRISPR Cas9 mediated  
777 gene deletion and suppression. *Nature Communications*, *8*(1), 1–8.



- 778 Shao, S., Brown, A., Santhanam, B., & Hegde, R. S. (2015). Structure and assembly pathway of  
779 the ribosome quality control complex. *Molecular Cell*, *57*(3), 433–444.
- 780 Shao, S., Malsburg, K. von der, & Hegde, R. S. (2013). Listerin-Dependent Nascent Protein Ubiquitination Relies on Ribosome Subunit Dissociation. *Molecular Cell*, *50*(5), 637–648.
- 781 Shao, S., Murray, J., Brown, A., Taunton, J., Ramakrishnan, V., & Hegde, R. S. (2016). Decoding  
782 mammalian ribosome-mRNA states by translational GTPase complexes. *Cell*, *167*(5), 1229–  
783 1240.
- 784 Shoemaker, C. J., & Green, R. (2012). Translation drives mRNA quality control. *Nature Structural  
785 & Molecular Biology*, *19*(6), 594–601.
- 786 Silva, A.L, Ribeiro, P., Inacio, A., Liebhaber, S.A., and Romao, L. (2008). Proximity of poly(A)-  
787 binding protein to a premature termination codon inhibits mammalian nonsense-mediated  
788 mRNA decay. *RNA*, *14*(3), 563-576.
- 789 Singh, G., Rebbapragada, I., & Lykke-Andersen, J. (2008). A competition between stimulators  
790 and antagonists of Upf complex recruitment governs human nonsense-mediated mRNA de-  
791 cay. *PLoS Biology*, *6*(4), e111. <https://doi.org/10.1371/journal.pbio.0060111>
- 792 Sun, Y., Yang, P., Zhang, Y., Bao, X., Li, J., Hou, W., Yao, X., Han, J., & Zhang, H. (2011). A  
793 genome-wide RNAi screen identifies genes regulating the formation of P bodies in *C. elegans*  
794 and their functions in NMD and RNAi. *Protein & Cell*, *2*(11), 918–939.
- 795 Takahashi, S., Araki, Y., Ohya, Y., Sakuno, T., Hoshino, S. I., Kontani, K., Nishina, H., & Katada,  
796 T. (2008). Upf1 potentially serves as a RING-related E3 ubiquitin ligase via its association  
797 with Upf3 in yeast. *Rna*, *14*(9), 1950–1958. <https://doi.org/10.1261/rna.536308>
- 798 Takahashi, S., Araki, Y., Sakuno, T., & Katada, T. (2003). Interaction between Ski7p and Upf1p  
799 is required for nonsense-mediated 3'-to-5' mRNA decay in yeast. *The EMBO Journal*, *22*(15),  
800 3951–3959.
- 801 Thein, S. L., Hesketh, C., Taylor, P., Temperley, I. J., Hutchinson, R. M., Old, J. M., Wood, W.  
802 G., Clegg, J. B., & Weatherall, D. J. (1990). Molecular basis for dominantly inherited inclu-  
803 sion body beta-thalassemia. *Proceedings of the National Academy of Sciences*, *87*(10), 3924–  
804 3928.
- 805 Udy, D. B., & Bradley, R. K. (2021). Nonsense-mediated mRNA decay utilizes complementary  
806 mechanisms to suppress mRNA and protein accumulation. *BioRxiv*.
- 807 van Hoof, A., Frischmeyer, P. A., Dietz, H. C., & Parker, R. (2002). Exosome-mediated recogni-  
808 tion and degradation of mRNAs lacking a termination codon. *Science*, *295*(5563), 2262–  
809 2264.
- 810 Verma, R., Oania, R. S., Kolawa, N. J., & Deshaies, R. J. (2013). Cdc48/p97 promotes degradation  
811 of aberrant nascent polypeptides bound to the ribosome. *Elife*, *2*, e00308.
- 812 Verma, R., Reichermeier, K. M., Burroughs, A. M., Oania, R. S., Reitsma, J. M., Aravind, L., &  
813 Deshaies, R. J. (2018). Vms1 and ANKZF1 peptidyl-tRNA hydrolases release nascent chains  
814 from stalled ribosomes. *Nature*, *557*(7705), 446–451.
- 815 Wada, M., Lokugamage, K. G., Nakagawa, K., Narayanan, K., & Makino, S. (2018). Interplay  
816 between coronavirus, a cytoplasmic RNA virus, and nonsense-mediated mRNA decay path-  
817 way. *Proceedings of the National Academy of Sciences*, *115*(43), E10157--E10166.
- 818 Wang, J., Vock, V. M., Li, S., Olivas, O. R., & Wilkinson, M. F. (2002). A quality control pathway  
819 that down-regulates aberrant T-cell receptor (TCR) transcripts by a mechanism requiring  
820 UPF2 and translation. *Journal of Biological Chemistry*, *277*(21), 18489–18493.
- 821 Wang, Y., Wang, F., Wang, R., Zhao, P., & Xia, Q. (2015). 2A self-cleaving peptide-based multi-  
822 gene expression system in the silkworm *Bombyx mori*. *Scientific Reports*, *5*(1), 1–10.
- 823

- 824 Ware, M. D., DeSilva, D., Sinilnikova, O. M., Stoppa-Lyonnet, D., Tavtigian, S. v., & Mazoyer,  
825 S. (2006). Does nonsense-mediated mRNA decay explain the ovarian cancer cluster region  
826 of the BRCA2 gene? *Oncogene*, *25*(2), 323–328. <https://doi.org/10.1038/sj.onc.1209033>  
827 Wilson, M. A., Meaux, S., & van Hoof, A. (2007). A genomic screen in yeast reveals novel aspects  
828 of nonstop mRNA metabolism. *Genetics*, *177*(2), 773–784.  
829 Yamashita, A., Chang, T.-C., Yamashita, Y., Zhu, W., Zhong, Z., Chen, C.-Y. A., & Shyu, A.-B.  
830 (2005). Concerted action of poly (A) nucleases and decapping enzyme in mammalian mRNA  
831 turnover. *Nature Structural & Molecular Biology*, *12*(12), 1054–1063.  
832 Yewdell, J. W., & Nicchitta, C. v. (2006). The DRiP hypothesis decennial: support, controversy,  
833 refinement and extension. *Trends in Immunology*, *27*(8), 368–373.  
834 Zavodszky, E., Peak-Chew, S.-Y., Juskiewicz, S., Narvaez, A. J., & Hegde, R. S. (2021). Identifi-  
835 cation of a quality-control factor that monitors failures during proteasome assembly. *Sci-  
836 ence*, *373*(6558), 998–1004.  
837 Zhang, J., & Maquat, L. E. (1997). Evidence that translation reinitiation abrogates nonsense-me-  
838 diated mRNA decay in mammalian cells. *The EMBO Journal*, *16*(4), 826–833.  
839 Zinshteyn, B., Sinha, N. K., Enam, S. U., Koleske, B., & Green, R. (2021). Translational repression  
840 of NMD targets by GIGYF2 and EIF4E2. *PLoS Genetics*, *17*(10), e1009813.

841

#### 842 **ACKNOWLEDGEMENTS**

843 We thank Tino Pleiner, Joseph Replogle and the Voorhees lab for discussion and Simon Byrne  
844 and Patrick Smyth for help with data processing. Flow cytometry experiments were performed at  
845 the Caltech flow cytometry facility. The Whitehead Institute Genome Technology core performed  
846 sequencing for genome-wide screens. This work was supported by the Heritage Medical Research  
847 Institute, the Kinship Foundation, the Pew-Stewart Foundation and by the Millard and Muriel Ja-  
848 cobs Genetics and Genomics Laboratory at California Institute of Technology. A.J.I. was sup-  
849 ported by a Caltech BBE postdoctoral fellowship and a grant from the Larry L. Hillblom Founda-  
850 tion and A.G. by a Human Frontier Science Program fellowship. The three co-first authors are  
851 joint authors and as such they can prioritize their names when adding this paper to their resumes.

852

853

854

855

#### 856 **Supplementary Materials:**

857 Materials and Methods

858 Figs. S1-S4

859 Supplementary Tables 1-3

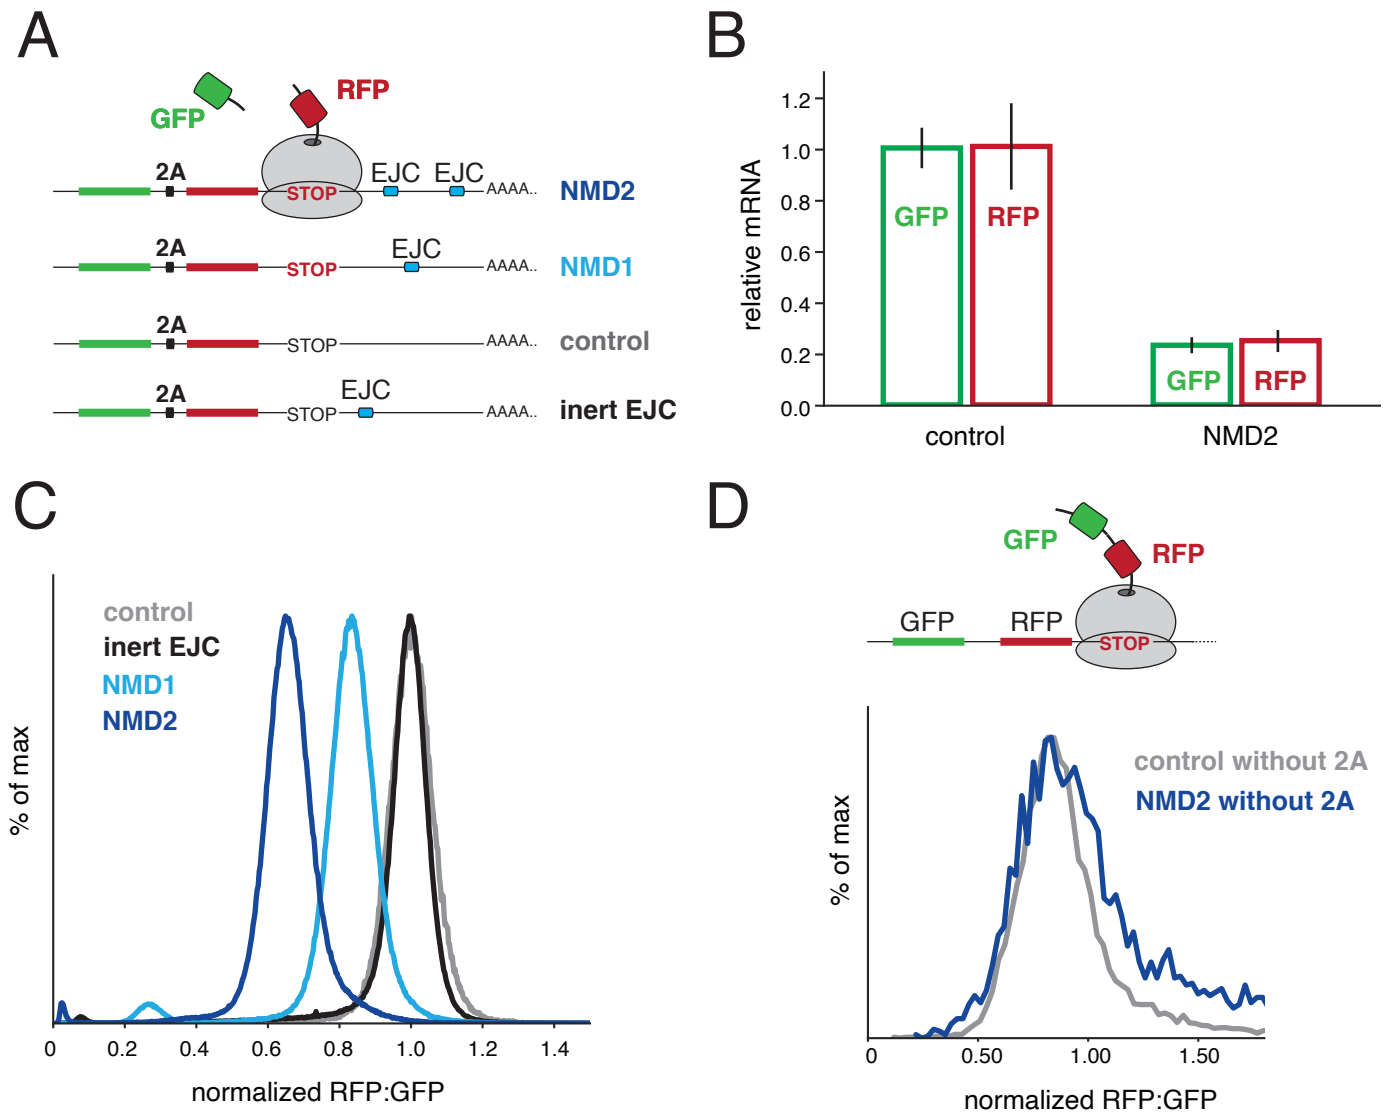

**Figure 1. Destabilization of nascent proteins from PTC-containing mRNAs.**

(A) Schematic of the reporter strategy used to decouple protein and mRNA degradation in NMD. GFP and RFP are encoded in a single open reading frame separated by a viral 2A sequence. Positioning an intron within the 3' UTR results in deposition of an exon junction complex (EJC) upon splicing, triggering NMD when compared to a matched control (stop codon depicted in red). Either one or two introns derived from the  $\beta$ -globin gene are inserted after the stop codon (NMD1 and NMD2 respectively). To control for the documented stimulation in translation that results from the presence of an EJC (Nott et al., 2004), we created a reporter in which the intron was positioned twelve nucleotides after the stop codon, a distance insufficient for recognition as an NMD substrate (inert EJC) (Nagy & Maquat, 1998). (B) Stable cell lines expressing either the control or the reporter was induced with doxycycline for 24 hours and the total mRNA was then purified. Relative mRNA levels were determined by RT-qPCR using primers that anneal to the very 5' region of the GFP and 3' region of the RFP open reading frames. The results were normalized to the control and the standard deviation from three independent experiments is displayed. (C) Stable cell lines for the indicated reporters were analyzed by flow cytometry. The ratio of RFP:GFP fluorescence, as normalized to the control reporter is depicted as a histogram. (D) The NMD2 and control reporters in which the 2A sequence was scrambled, resulting in tethering of both GFP and RFP to the ribosome at the stop codon were analyzed as in (C).

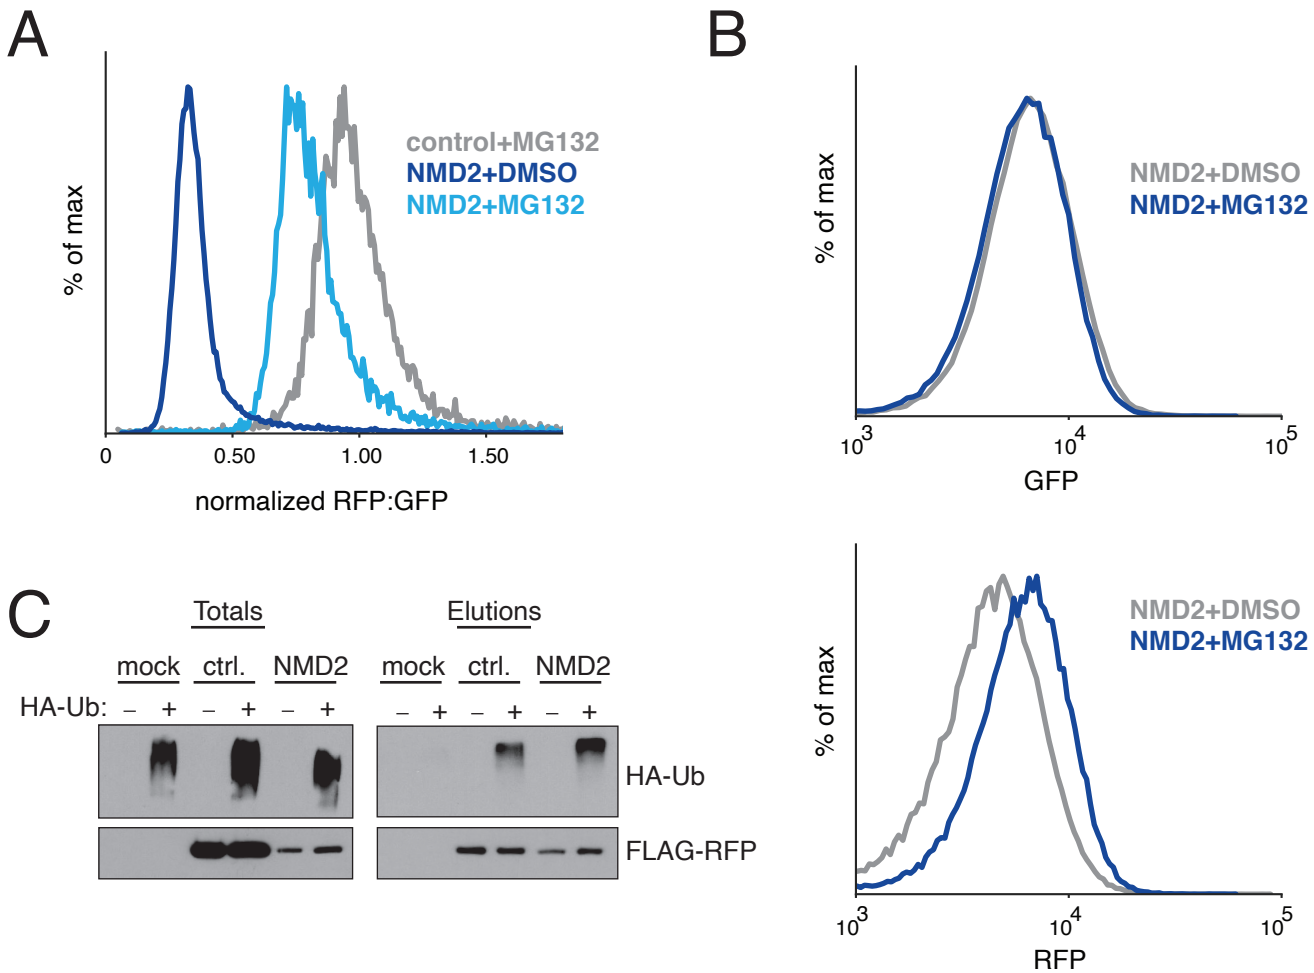

**Figure 2. NMD-dependent protein degradation occurs via the ubiquitin proteasome pathway.**

(A) Flow cytometry analysis of HEK293T cells transiently transfected with either the control or NMD2 reporter (Fig. 1A) and treated with the proteasome inhibitor MG132 or DMSO. (B) As in (A) using stable K562 cell lines expressing an inducible NMD2 reporter treated with either MG132 or DMSO. Shown are the GFP (top) and RFP (bottom) channels for the indicated conditions displayed as a histogram. (C) HEK-293T cells were transiently transfected with either the control or NMD2 reporter (modified to incorporate a 3xFLAG tag at the N-terminus of RFP) in the presence of HA-tagged ubiquitin (HA-Ub). To stabilize ubiquitinated species, cells were treated with MG132 prior to lysis, and RFP was immunoprecipitated with anti-FLAG resin. Ubiquitinated species were detected by Western blotting for HA-Ub.

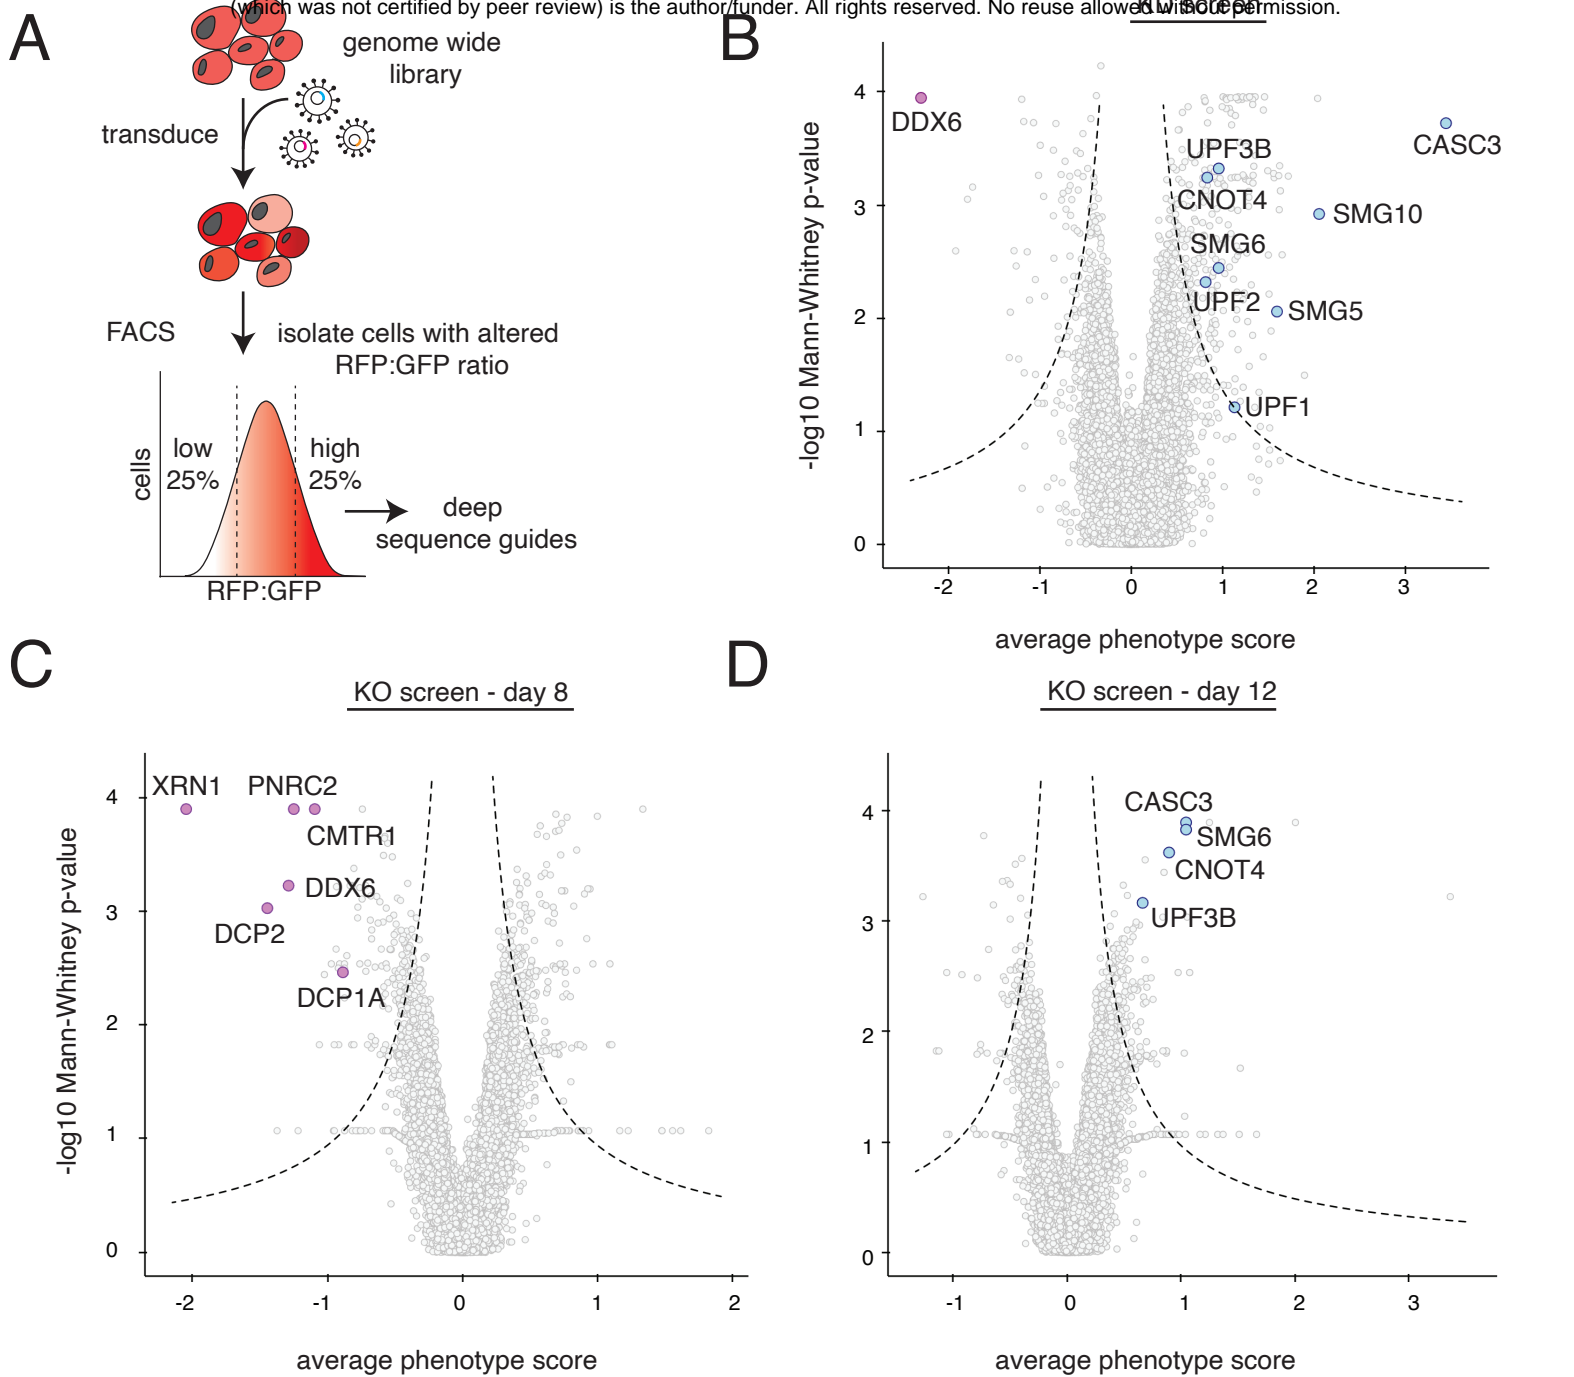

**Figure 3. Systematic characterization of factors required for NMD-coupled protein quality control.**

(A) Schematic of the workflow used to carry-out the FACS-based reporter screens to identify factors involved in NMD-linked nascent chain degradation. K562 cells reporter cell lines contained a tet-inducible NMD2 reporter and were infected with either a whole-genome CRISPRi sgRNA library or a CRISPR-KO library. Reporter expression was induced with doxycycline for 24 hours prior to cell sorting. Cells were sorted based on ratiometric changes in RFP relative to GFP, and the sgRNA expressed in those cells were identified using deep sequencing. The CRISPR knockout screen was sorted on days 8, 10 and 12 post library infection to account for drop out of essential genes. The CRISPRi screen was sorted on day 8. (B) Volcano plot of the RFP:GFP stabilization phenotype ( $\log_2$  for the three strongest sgRNAs) and Mann-Whitney p values from the genome-wide CRISPRi screen. Genes falling outside the dashed lines are statistically significant. Each gray point represents a gene. Notable hits causing an increase in the RFP to GFP ratio are shown in light blue and include known NMD factors (UPF1, UPF2, UPF3B, SMG5, SMG6, SMG10) and the E3 ligase CNOT4. DDX6, a known suppressor of NMD, which causes a lower RFP to GFP ratio, is shown in purple. (C) Volcano plot as in (B) from the genome-wide CRISPR knock-out screen sorted at an early time point, prior to essential gene drop out. In purple are highlighted factors that cause a decrease in RFP relative to GFP. These include genes involved in mRNA decapping (PNRC1, CMTR1, DCP1A, and DCP2), DDX6, and the 5'-3' exonuclease XRN1. (D) As in (C) but from day 12. In blue are shown known NMD factors (CASC3, SMG6, UPF3B) and the E3 ligase CNOT4.



A

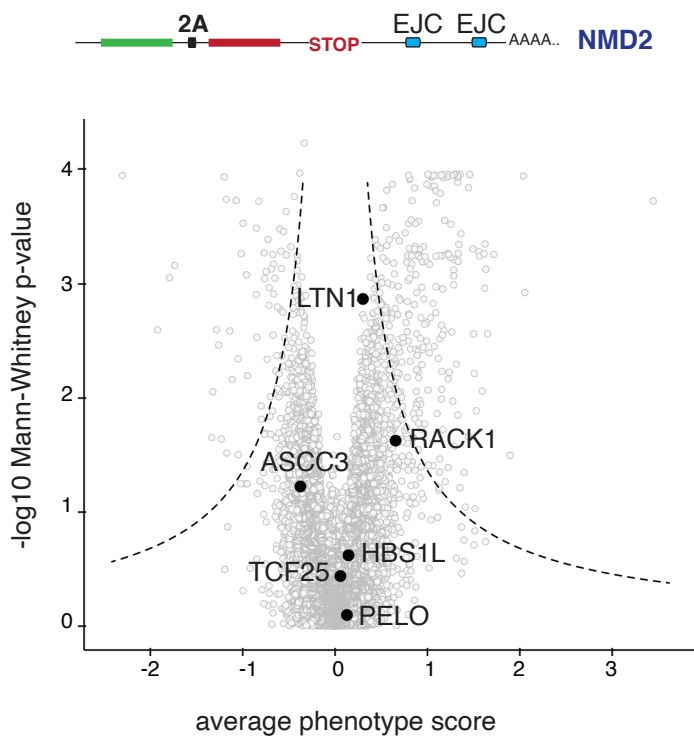

B

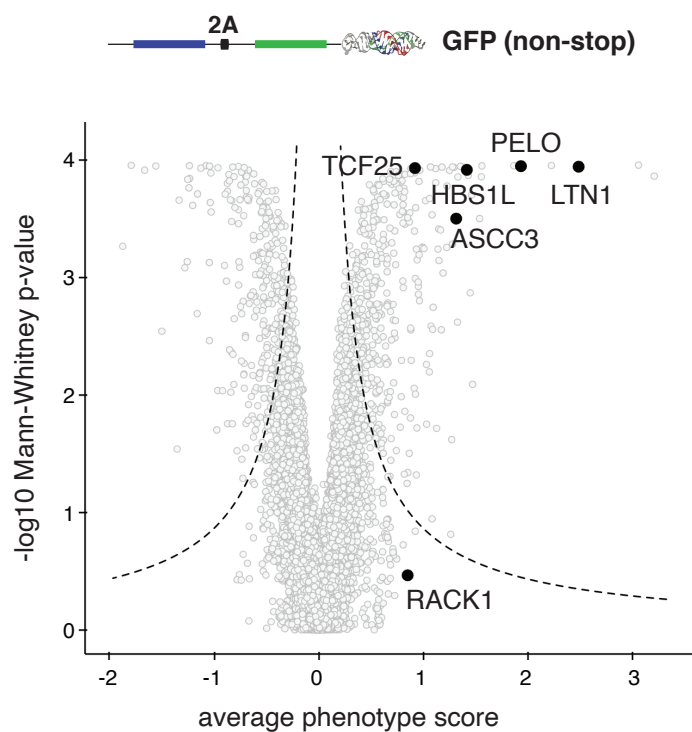

C

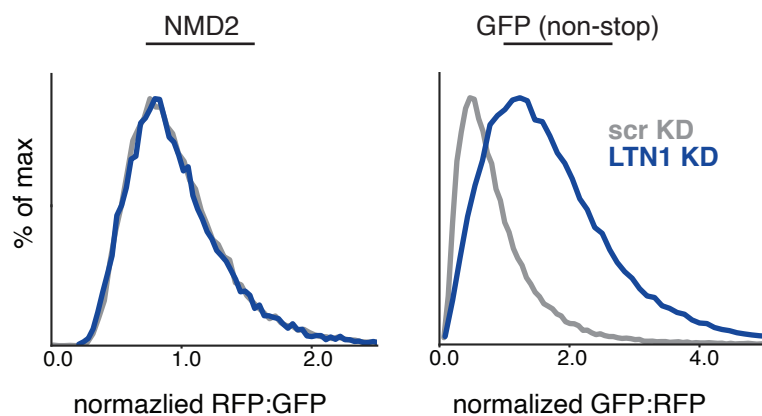

**Figure 4. NMD-linked protein degradation is not mediated by the canonical RQC pathway.**

(A) Volcano plot of the NMD2 reporter CRISPRi screen as in Fig 3A. Highlighted in black are factors involved in the canonical RQC. (B) For comparison, RQC factors are highlighted in black on a volcano plot for a earlier CRISPRi screen using a non-stop reporter conducted using identical conditions as in (A) (Hickey et al., 2020). (C) K562 cells containing CRISPRi machinery and either an inducible NMD2 reporter or a constitutively expressed bidirectional GFP non-stop reporter (as in Hickey, 2020) were infected with a sgRNA targeting the E3 ligase LTN1. The RFP to GFP ratio for NMD2, and the GFP to RFP ratio for the GFP non-stop reporter as determined by flow cytometry are displaced as a histogram.

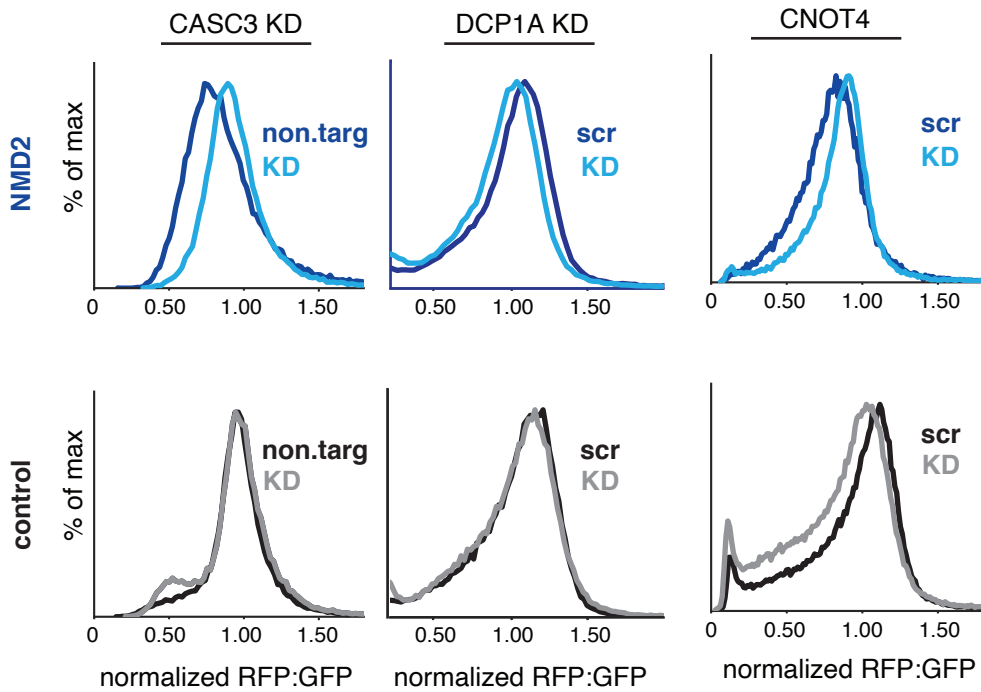

**Figure 5. Validation of factors involved in NMD-coupled protein quality control.**

Panel of validated hits from NMD2 screens. Factors of interest were depleted by either sgRNA in K562 cells, or by siRNA in HEK293T cells as indicated. Displayed are the RFP:GFP ratio for the NMD2 (top) and control (bottom) reporters as determined by flow cytometry. Data was normalized to the scrambled siRNA (scr) or the non-targeting guide controls (non.targ).

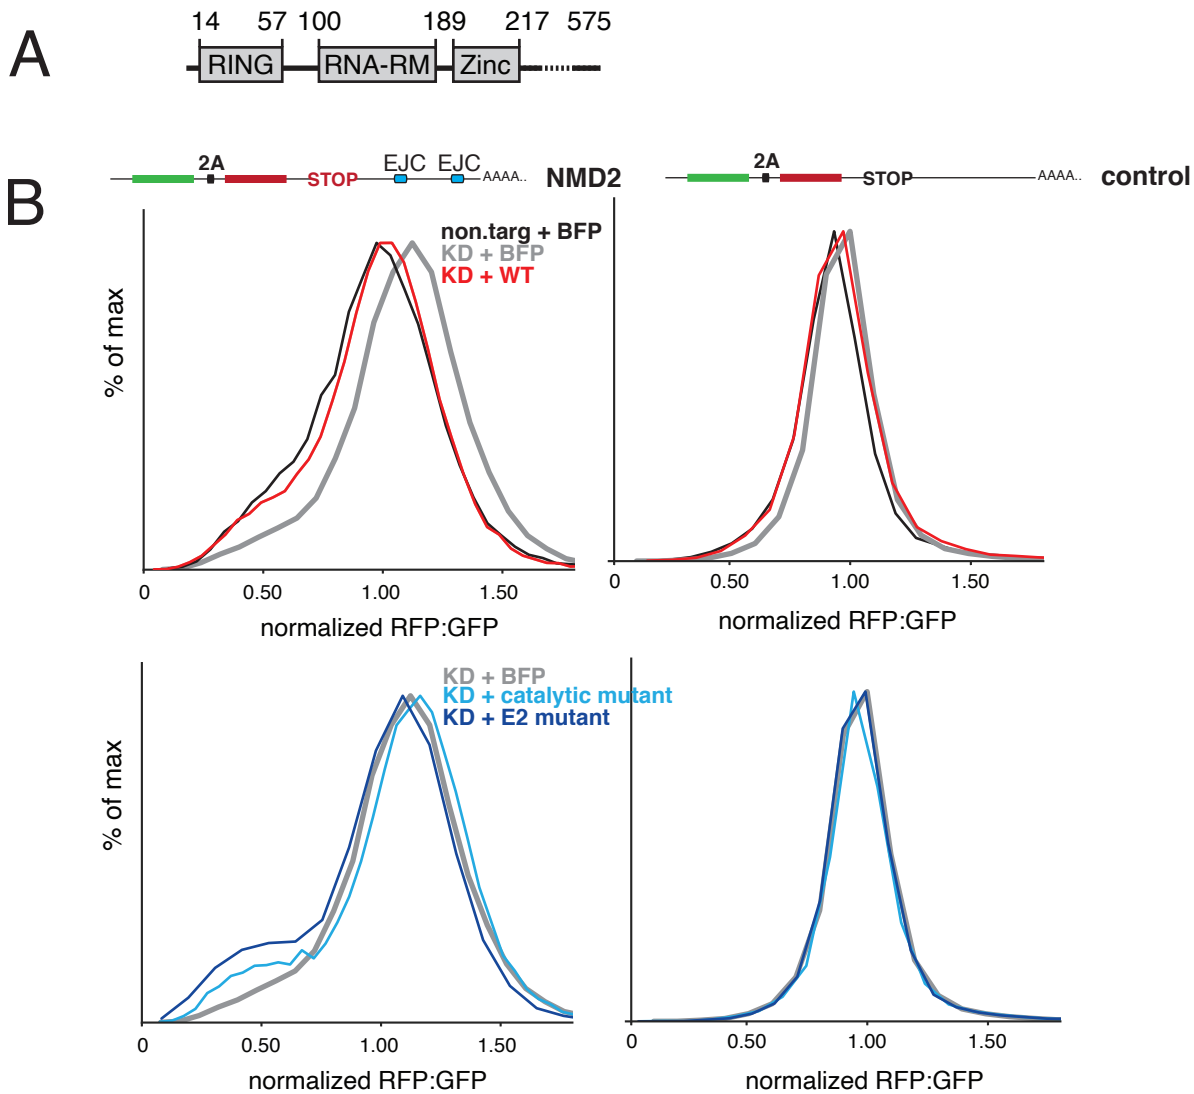

**Figure 6. A putative role for CNOT4 in NMD-coupled protein quality control.**

(A) Schematic of the E3 ubiquitin ligase CNOT4 domain architecture (RNA recognition motif=RNA-RM). (B) CNOT4 depletion was rescued by expression of either wild type or two CNOT4 mutants: (i) a catalytic mutant (C14A, C17A), predicted to disrupt the folding of the CNOT4 RING domain; or (ii) an E2 mutant (L16A, C17A, C33R) that disrupts binding of CNOT4 to its cognate E2 (Albert et al., 2002). BFP was co-expressed from the rescue plasmids to allow identification of cells expressing the CNOT4 wt or mutant proteins. Displayed is a histogram of RFP:GFP fluorescence of the NMD2 and control reporters in the indicated conditions in comparison to a mock control expressing BFP alone. For comparison, data for KD+BFP is displayed in both the top and bottom histograms.

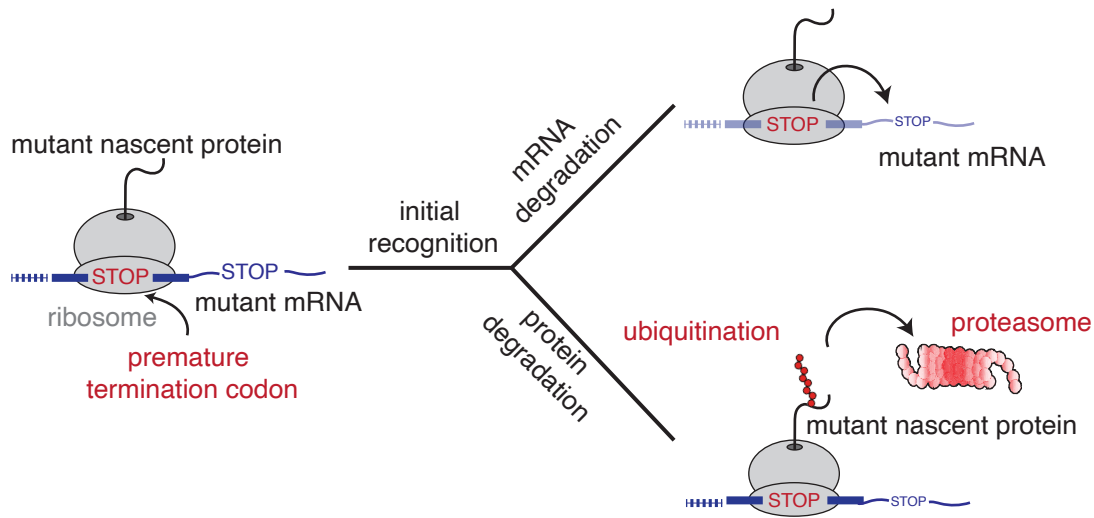

**Figure 7. Model for NMD-coupled protein quality control.**

When the ribosome reaches the stop codon, NMD substrates are recognized in a context-dependent manner. These early recognition steps initiate two parallel pathways that rely on distinct suites of factors to concomitantly degrade the mRNA and nascent protein. We postulate that NMD-coupled quality control results in ubiquitination of the nascent protein prior to its release from the ribosome where it subsequently degraded by the proteasome.
